# Supplementary material
Source: Research Square preprint supplement (doi:10.21203/rs.3.rs-9338442/v1)
Supplement: Supplementary file 1 [file 89f002c38cc294482f47f920.docx]

***De novo* biosynthesis and whole-cell production of** **alkoxylated phenazine derivatives**

Chaozhi Wang1,#, Shuo Zhang1,3,#, Sijia Xu1,Chuanzeng Wang1,Zhe Zhang4, Mohd Sadeeq1, Yupeng Wan4,Chen Gao5, Wei Huang2,*, Peng Xiong1,*and Feifei Hou1,*

|  |
| --- |

1 Shandong University of Technology, School of Life Sciences and Medicine, 255000 Zibo, China.

2 Shandong Freda Biotech Co., Ltd, 250101 Jinan, China.

3 Shandong University of Traditional Chinese Medicine, College of Traditional Chinese Medicine, 250355, Jinan, China.

4 CAS Key Lab of Biobased Materials, Qingdao Institute of Bioenergy and Bioprocess Technology, Chinese Academy of Sciences, 266101 Qingdao, China.

5 Jinan Central Hospital affiliated to Shandong university, 250013, Jinan, China.

# These authors contributed equally to this work.

*Corresponding authors:Wei Huang, [huangwei2205@163.com](mailto:huangwei2205@163.com); Peng Xiong, [xiongp@sdut.edu.cn](mailto:xiongp@sdut.edu.cn); Feifei Hou, houff@sdut.edu.cn.

**Table of Contents**

**Table S1.** Strains and plasmids in this study.

**Table S2.** Primers in this study.

**Table S3.** Sequences of genes in this study.

**Table S4.** 1H and 13C spectra data for 1-ethoxyphenazine recorded by 400 MHz NMR spectrometer in CDCl3.

**Table S5.** 1H and 13C spectra data for 1-fluoromethoxyphenazine recorded by 400 MHz NMR spectrometer in CDCl3.

**Table S6.** Alkoxylation reactions of phenazine analogues.

**Figure S1.** The structure of 1-ethoxyphenazine with key ¹H-¹H COSY (bold lines) and HMBC (arrows) correlations.

**Figure S2.** 1H NMR of 1-ethoxyphenazine.

**Figure S3.** 13C NMR of 1-ethoxyphenazine.

**Figure S4.** 1H-1H COSY NMR of 1-ethoxyphenazine.

**Figure S5.** HSQC NMR of 1-ethoxyphenazine.

**Figure S6.** HMBC NMR of 1-ethoxyphenazine.

**Figure S7.** *In vitro* production of 2-ethoxyphenazine from 2-hydroxyphenazine catalyzed by HMT1 and LaPhzM.

**Figure S8.** *In vitro* production of 2-propoxyphenazine from 2-hydroxyphenazine catalyzed by HMT1 and LaPhzM.

**Figure S9.** HR-MS analysis of 1-ethoxyphenazine *N*′ 10-oxide.

**Figure S10.** 1H NMR of 1-ethoxyphenazine *N*′ 10-oxide.

**Figure S11.** The structure of 1-fluoromethoxyphenazine with key ¹H-¹H COSY (bold lines) and HMBC (arrows) correlations.

**Figure S12.** 1H NMR of 1-fluoromethoxyphenazine.

**Figure** **S13.** 13C NMR of 1-fluoromethoxyphenazine.

**Figure S14.** 1H-1H COSY NMR of 1-fluoromethoxyphenazine.

**Figure S15.** HSQC NMR of 1-fluoromethoxyphenazine.

**Figure** **S16.** HMBC NMR of 1-fluoromethoxyphenazine.

**Figure S17.** 1H NMR of 2-fluoromethoxyphenazine.

**Figure S18.** HR-MS analysis of 2-fluoromethoxyphenazine.

**Figure S19.** HR-MS analysis of 1-fluoromethoxyphenazine *N*ˊ 10-oxide.

**Table S1.** Strains and plasmids in this study.

| **Resource** | **Description** | **Reference or source** |
| --- | --- | --- |
| **Strains** | | |
| *E. coli* DH5α | For cloning work | Novagen |
| *E. coli* BL21(DE3) | For protein expression | Novagen |
| **plasminds** | | |
| pET-28a | Plasmid with pBR322 replication origin | Novagen |
| pET28a-LaphzM | LaphzM expressed from plasmid pET-28a | In this study |
| pET28a-HMT1 | HMT1 expressed from plasmid pET-28a | In this study |
| pET28a-HMT2 | HMT2 expressed from plasmid pET-28a | In this study |

**Table S2.** Primers in this study.

| **Primers** | **Sequence 5’-3’** | **Restrict enzyme sites** | **Purpose** |
| --- | --- | --- | --- |
| LaphzMF | atgggtcgcggatccgaattcATGACCGAAAATAACCGCGC | EcoRI | Used for plasmid (pET28a-LaphzM) construction |
| LaphzMR | ctcgagtgcggccgcaagcttTTAAATCGGACGGGCTTCC | HindIII |
| HMT2F | atgggtcgcggatccgaattcATGAGCGATCCGACCCAGC | EcoRI | Used for plasmid (pET28a-HMT2) construction |
| HMT2R | ctcgagtgcggccgcaagcttTTATGCACGACGACGCCAG | HindIII |
| HMT1F | atgggtcgcggatccgaattcATGGCCGAAGAACAGCAGAAT | EcoRI | Used for plasmid (pET28a-HMT1) construction |
| HMT1R | ctcgagtgcggccgcaagcttTTAATTAATCTTTTTCCAGCGGC | HindIII |
| NaphzNO1F | atgggtcgcggatccgaattcGTGACCAACGCGAAGAACACC | EcoRI | Used for plasmid (pET28a- NaphzNO1) construction |
| NaphzNO1R | ctcgagtgcggccgcaagcttTCAGGCGGTCACCACCGA | HindIII |

**Table S3.** Sequences of genes in this study.

| *LaphzM* |
| --- |
| ATGACCGAAAATAACCGCGCCGGTGCCGTGCCGCTGAGCAGCATTTTATTACAAATGATTACCGGCTACTGGGTGACCCAGAGCCTGTACGTGGCCGCCAAACTGGGTATTGCCGATCTGGTGGCCGATGCCCCGAAACCGATTGAAGAACTGGCCGCCAAAACCGGCGCCAAAGCCCCGTTGCTGAAACGCGTGTTAAGAACCATCGCCAGCATTGGTGTGTTTACCGAAACCGAACCGGGCATCTTCGGCATCACCCCGCTGGCCGCCCTGCTGCGCAGTGGTACCCCAGACAGCATGCGCCCACAAGCCATTATGCATGGCGAAGAACAATACCGCGCCTGGGCCGATGTGCTGCATAATGTGCAAACCGGCGAAACCGCCTTTGAAAAGGAGTTCGGCACCAGCTACTTCGGCTACCTGGCCAAACATCCGGAAGCCGACCGCGTGTTTAACGAAGCCCAGGCCGGTTACACCAAACAGGTGGCCCATGCCGTGGTGGACGCCTATGATTTTAGCCCGTTCAAGACCGTGATCGACATCGGCGCCGGTTATGGTCCGCTGTTGAGCGCCATTCTGCGCAGCCAACCGGAAGCCCGTGGCATTCTGTTTGATCAACCGCATGTGGCCCAAGCCGCCGGTAAACGCCTGGCCGAAGCAGGTGTGGGTGATCGCTGTGGTACCGTGGGTGGTGATTTCTTTGTGGAAGTGCCGGCCGATGGCGACGTGTATATTCTGAGCCTGCTGCTGCACGACTGGGACGACCAACGCAGTATTGAAATCCTGCGCAACTGCCGCCGCGCCATGCCAGCCCATGGTAAACTGTTGATTGTGGAACTGGTGCTGCCGGAAGGCGAAGAACCGTTTTTCGGCAAATGGCTGGACCTGCACATGCTGGTGCTGCTGGGTGCCCAAGAACGCACCGCCGATGAATTTAAAACCCTGTTCGCCGCCAGCGGCTTTGCCCTGGAACGCGTGTTACCAACCGCCAGTGGTCTGAGCAT TGTGGAAGCCCGTCCGATTTAA |
| *HMT2* |
| ATGAGCGATCCGACCCAGCCGGCCGTTCCGGATTTTGAAACCCGCGATCCGAACAGCCCGGCATTTTGGGATGAACGTTTTGAACGTCGCTTTACCCCGTGGGATCAGGCAGGCGTTCCGGCAGCATTTCAGAGCTTTGCAGCACGTCATTCTGGTGCAGCAGTTCTGATTCCGGGTTGTGGTAGCGCGTATGAAGCCGTGTGGCTGGCCGGCCAGGGTAATCCGGTTCGTGCAATTGATTTTAGCCCTGCAGCGGTTGCAGCAGCACATGAACAGCTGGGTGCCCAGCATGCACAGCTGGTTGAACAGGCAGATTTTTTTACATACGAACCACCGTTTACCCCGGCATGGATTTATGAACGTGCATTTCTGTGTGCACTGCCGCTGGCACGTCGTGCGGATTATGCACATCGTATGGCCGATCTGCTGCCGGGTGGCGCACTGCTGGCAGGTTTTTTTTTTCTGGGTGCAACCCCGAAAGGTCCGCCTTTTGGTATTGAACGTGCAGAACTGGATGCACTGCTGACCCCTTATTTTGATCTGATTGAAGATGAAGCAGTTCATGATAGTATTGCTGTTTTTGCGGGTCGTGAACGTTGGCTGACCTGGCGTCGTCGTGCATAA |
| *HMT1* |
| ATGGGCAGTAGTCATCATCATCATCACCATAGTAGTGGTCTGGTGCCGCGCGGCAGTCATATGGCCGAAGAACAGCAGAATAGTGATCAGAGTAATGGCGGTAATGTGATTCCGACCCCGGAAGAAGTTGCAACCTTTCTGCATAAAACCGTTGAAGAAGGCGGTTGGGAAAAATGCTGGGAAGAAGAAATTACCCCGTGGGATCAGGGTCGTGCAACCCCGCTGATTGTGCATCTGGTGGATACCAGCAGCCTGCCGCTGGGTCGCGCCTTAGTGCCGGGTTGCGGTGGTGGTCATGATGTGGTTGCCATGGCCAGTCCGGAACGCTTTGTTGTTGGTCTGGATATTAGTGAAAGCGCCCTGGCAAAAGCCAATGAAACCTATGGTAGCAGTCCGAAAGCAGAATATTTTAGCTTTGTTAAAGAGGATGTGTTCACCTGGCGTCCGACCGAACTGTTTGATCTGATTTTTGATTATGTGTTCTTCTGTGCAATCGAACCGGAAATGCGCCCGGCATGGGCAAAAAGTATGTATGAACTGCTGAAACCGGATGGCGAACTGATTACCCTGATGTATCCGATTACCGATCATGTTGGTGGCCCGCCGTATAAAGTTGATGTTAGCACCTTTGAAGAAGTGCTGGTGCCGATTGGCTTTAAAGCCGTGAGCGTGGAAGAAAATCCGCATGCCATTCCGACCCGTAAAGGTAAAGAAAAACTGGGCCGCTGGAAAAAGATTAATTAA |
| *NaphzNO1* |
| GTGACCAACGCGAAGAACACCGATCTCGACGCGATCGTCGTCGGTGCCGGGTTCGCCGGCATCTACGCGCTGCACAAGCTCCGCAACGAACTGGGTCTGTCCGTCCGGGCCTTCGACAAGGCGGGCGGGGTCGGGGGCACCTGGTACTGGAACCGCTACCCCGGCGCCATGTCCGACAGCGAGGGCTTCATCTACCAGTACTCCTTCGACCGCGACCTGCTGCGGGAGTGGACCTGGAAGAAGCGCTACCTGTCCCAGGCGGAGATCCTGGGCTACCTGGAGGCGGTCGTGGAGCGGCACGACCTCGCCAGGGACATCCAGCTCAACACCGGCGTCGAGACGCTGGTCTACGACGAGGCCGCCGCCCTGTGGACCGCGACCACCAGTGACGGCCAGACCCTCACCGCCCGCTACGTGGTGACCGCCCTCGGACCGCTGTCCACCTCCCACTTCCCCGACTTCAAGGGCCGCGACAGCTTCCGGGGCCGCCTGGTCCACACCGGCTCCTGGCCCGACGACCTCGACATCGAGGGCAAGAGGGTCGGCGTCATCGGCACCGGCTCCACCGGAACCCAGTTCATCTGCGCGGCCTCGAAGGTGGCCGGGCAGCTCACCGTGTTCCAGCGGACCCCCCAGTACAACGTGCCCTCGGGCAACGCCGAGGTGGACGAGGCCTACTTCACCGACCTGCGCGGCCGCTACGACCAGGTCTGGGAGCAGGCCAAGAAGTCCCGCGTGGCGTGCGGCTTCGAGGAGAGCGAGATCGCCGCGATGAGCGTCTCCGAGGAGGAGCGCCGACGCGTCTTCCAGGAGAACTGGGACCGGGGCAACGGCTTCCGCTTCATGTTCGGCACCTTCTCCGACATCATCTTCGACCCCGAGGCCAACGAGGCGGCGGCCGACTTCATCCGGTCCAAGATCCGGGAGATCGTCAAGGACCCGGAGACCGCCCGCAAGCTCCAGCCGACCGACTACTACGCCAAGCGCCCGGTCTGCAACGAGGACTACTACGAGTCCTACAACCGGGACAACGTCAGCCTGGTGAGCCTCAAGGAGACCCCGATCCGGGAGTTCACGCCCACGGGGATCGTGACCGAGGACGGGGTGGAGCACGAGCTGGACATCGTCGTCTTCGCGACCGGTTTCGAGGCCGTCGAGGGCAGCTACCGGCAGATGGAGATCCGCGGCCGGGGCGGCGTGACCATCGAGGAGCACTGGGGGGACACGCCCGCCAGCTACCTCGGGGTCAACGTCTCGGGCTTCCCCAACATGTTCATGGTCTACGGCCCCAACAGCGTCTTCAGCAACCTGCCCACGGCCATCGAGACCCAGGTCGAGTGGATCACCGACCTGGTCCGGATGATGGAGGAGCGCGACCTGACCTCCATCGAGCCGACCCCGGAGGCGGAGGAGGGCTGGACCGAGCTGTGCACGCAGATCGCCGACCACTCCCTGTTCCCCAAGGTCAACTCCTGGATCTTCGGGGCGAACATCCCGGGCAAGAAGAAGCGGGTCCTGTTCTACTTCGCGGGGCTCGGCAACTACCGCCAGAAGCTCGGTGACGTGGCCGCGGCCGACTACGAGGGCTTCATGCTCAAGGGCAACCCCTCGGTGGTGACCGCCTGA |


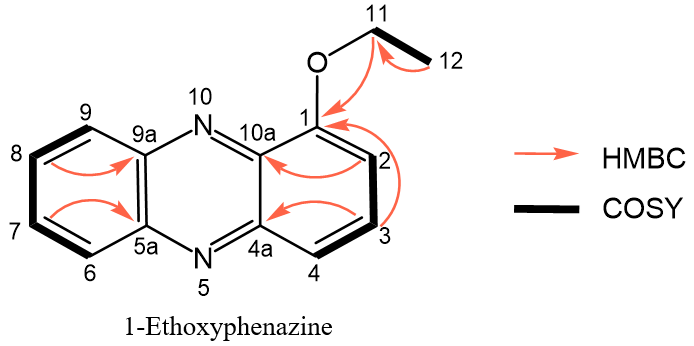


**Figure S1.** The structure of 1-ethoxyphenazine with key ¹H-¹H COSY (bold lines) and HMBC (arrows) correlations.


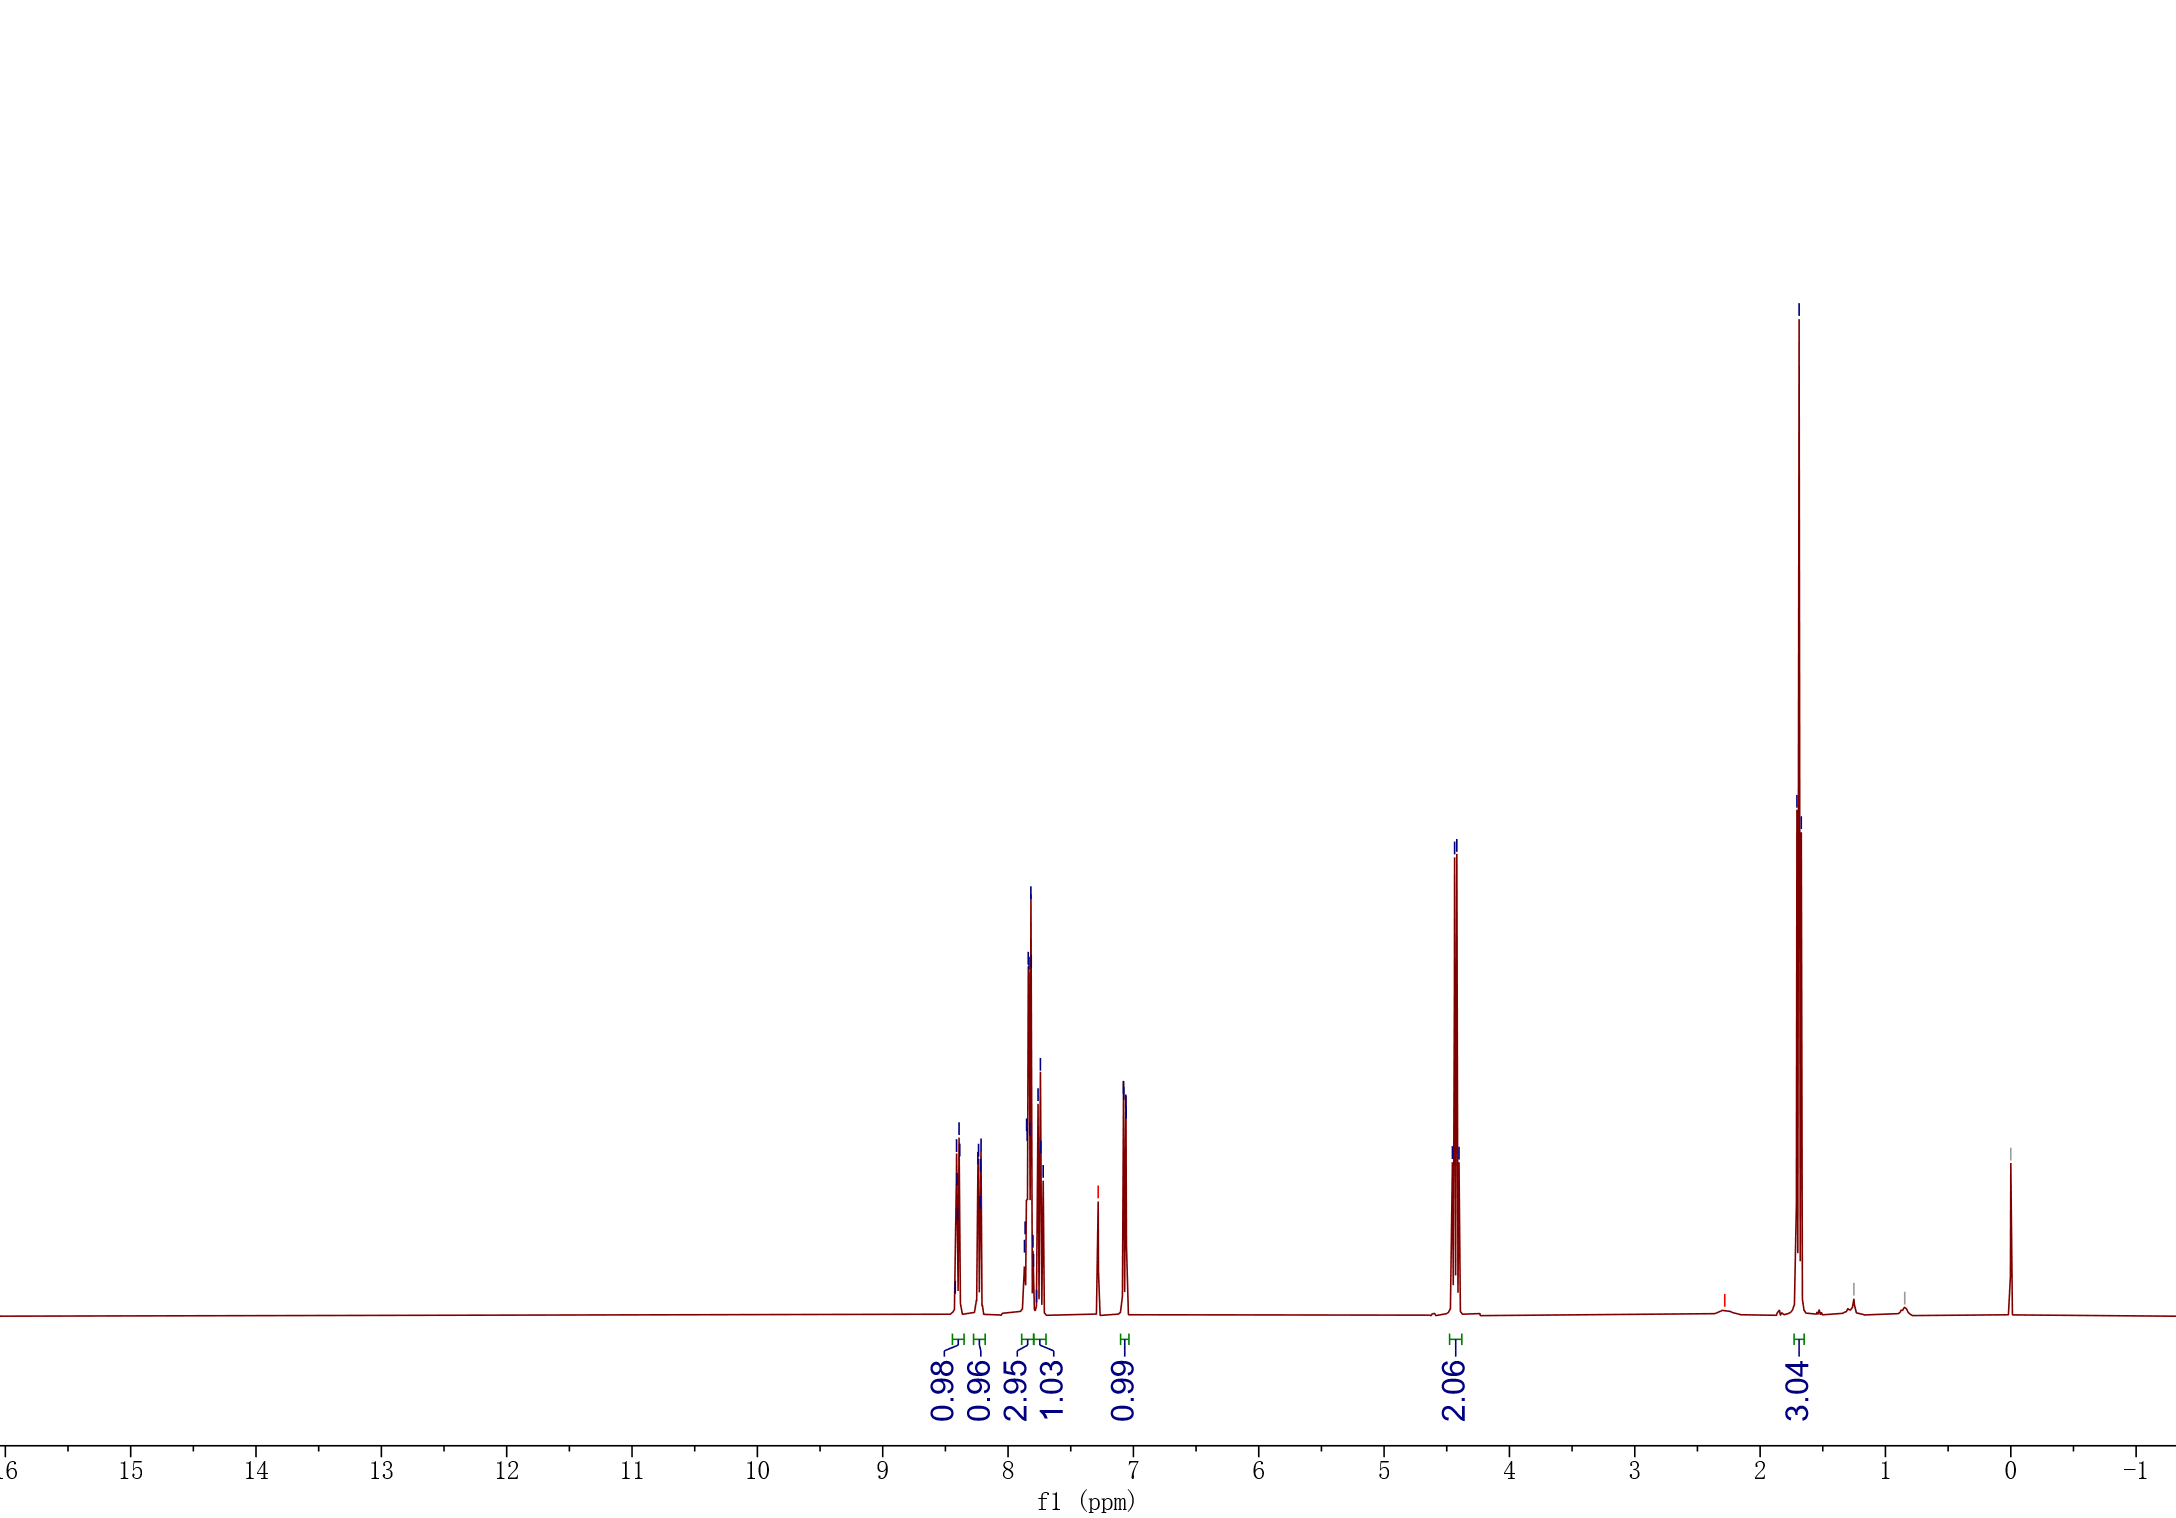
 **Figure S2.** 1H NMR of 1-ethoxyphenazine.


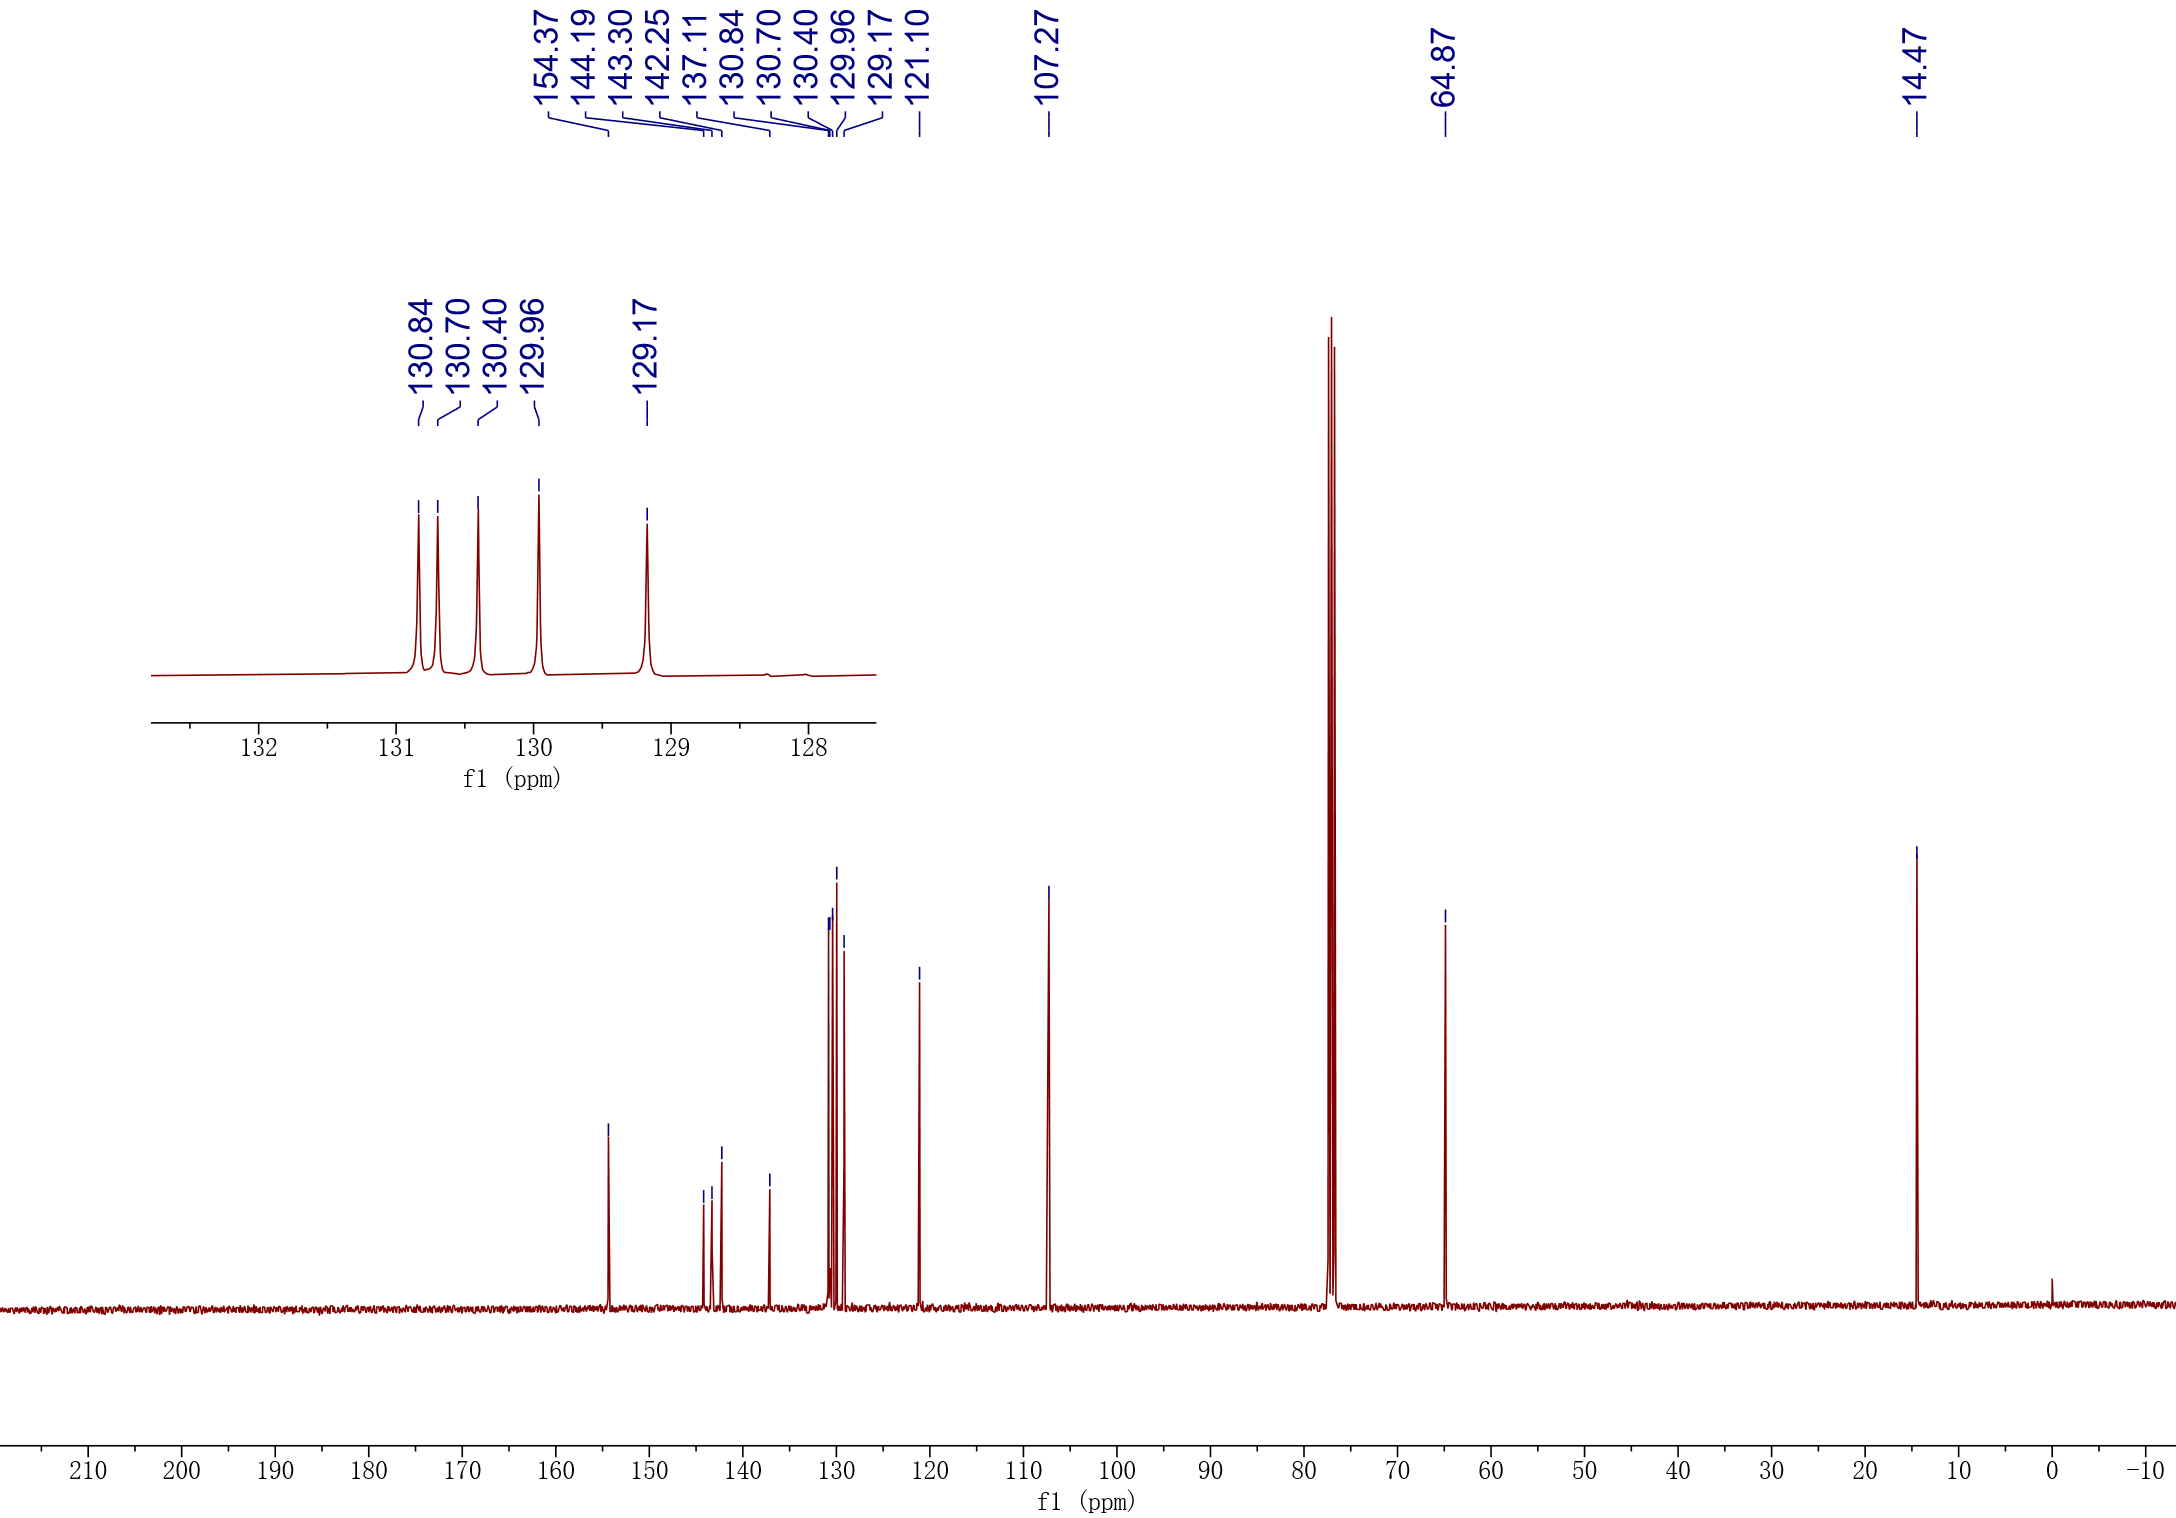
 **Figure S3.** 13C NMR of 1-ethoxyphenazine.


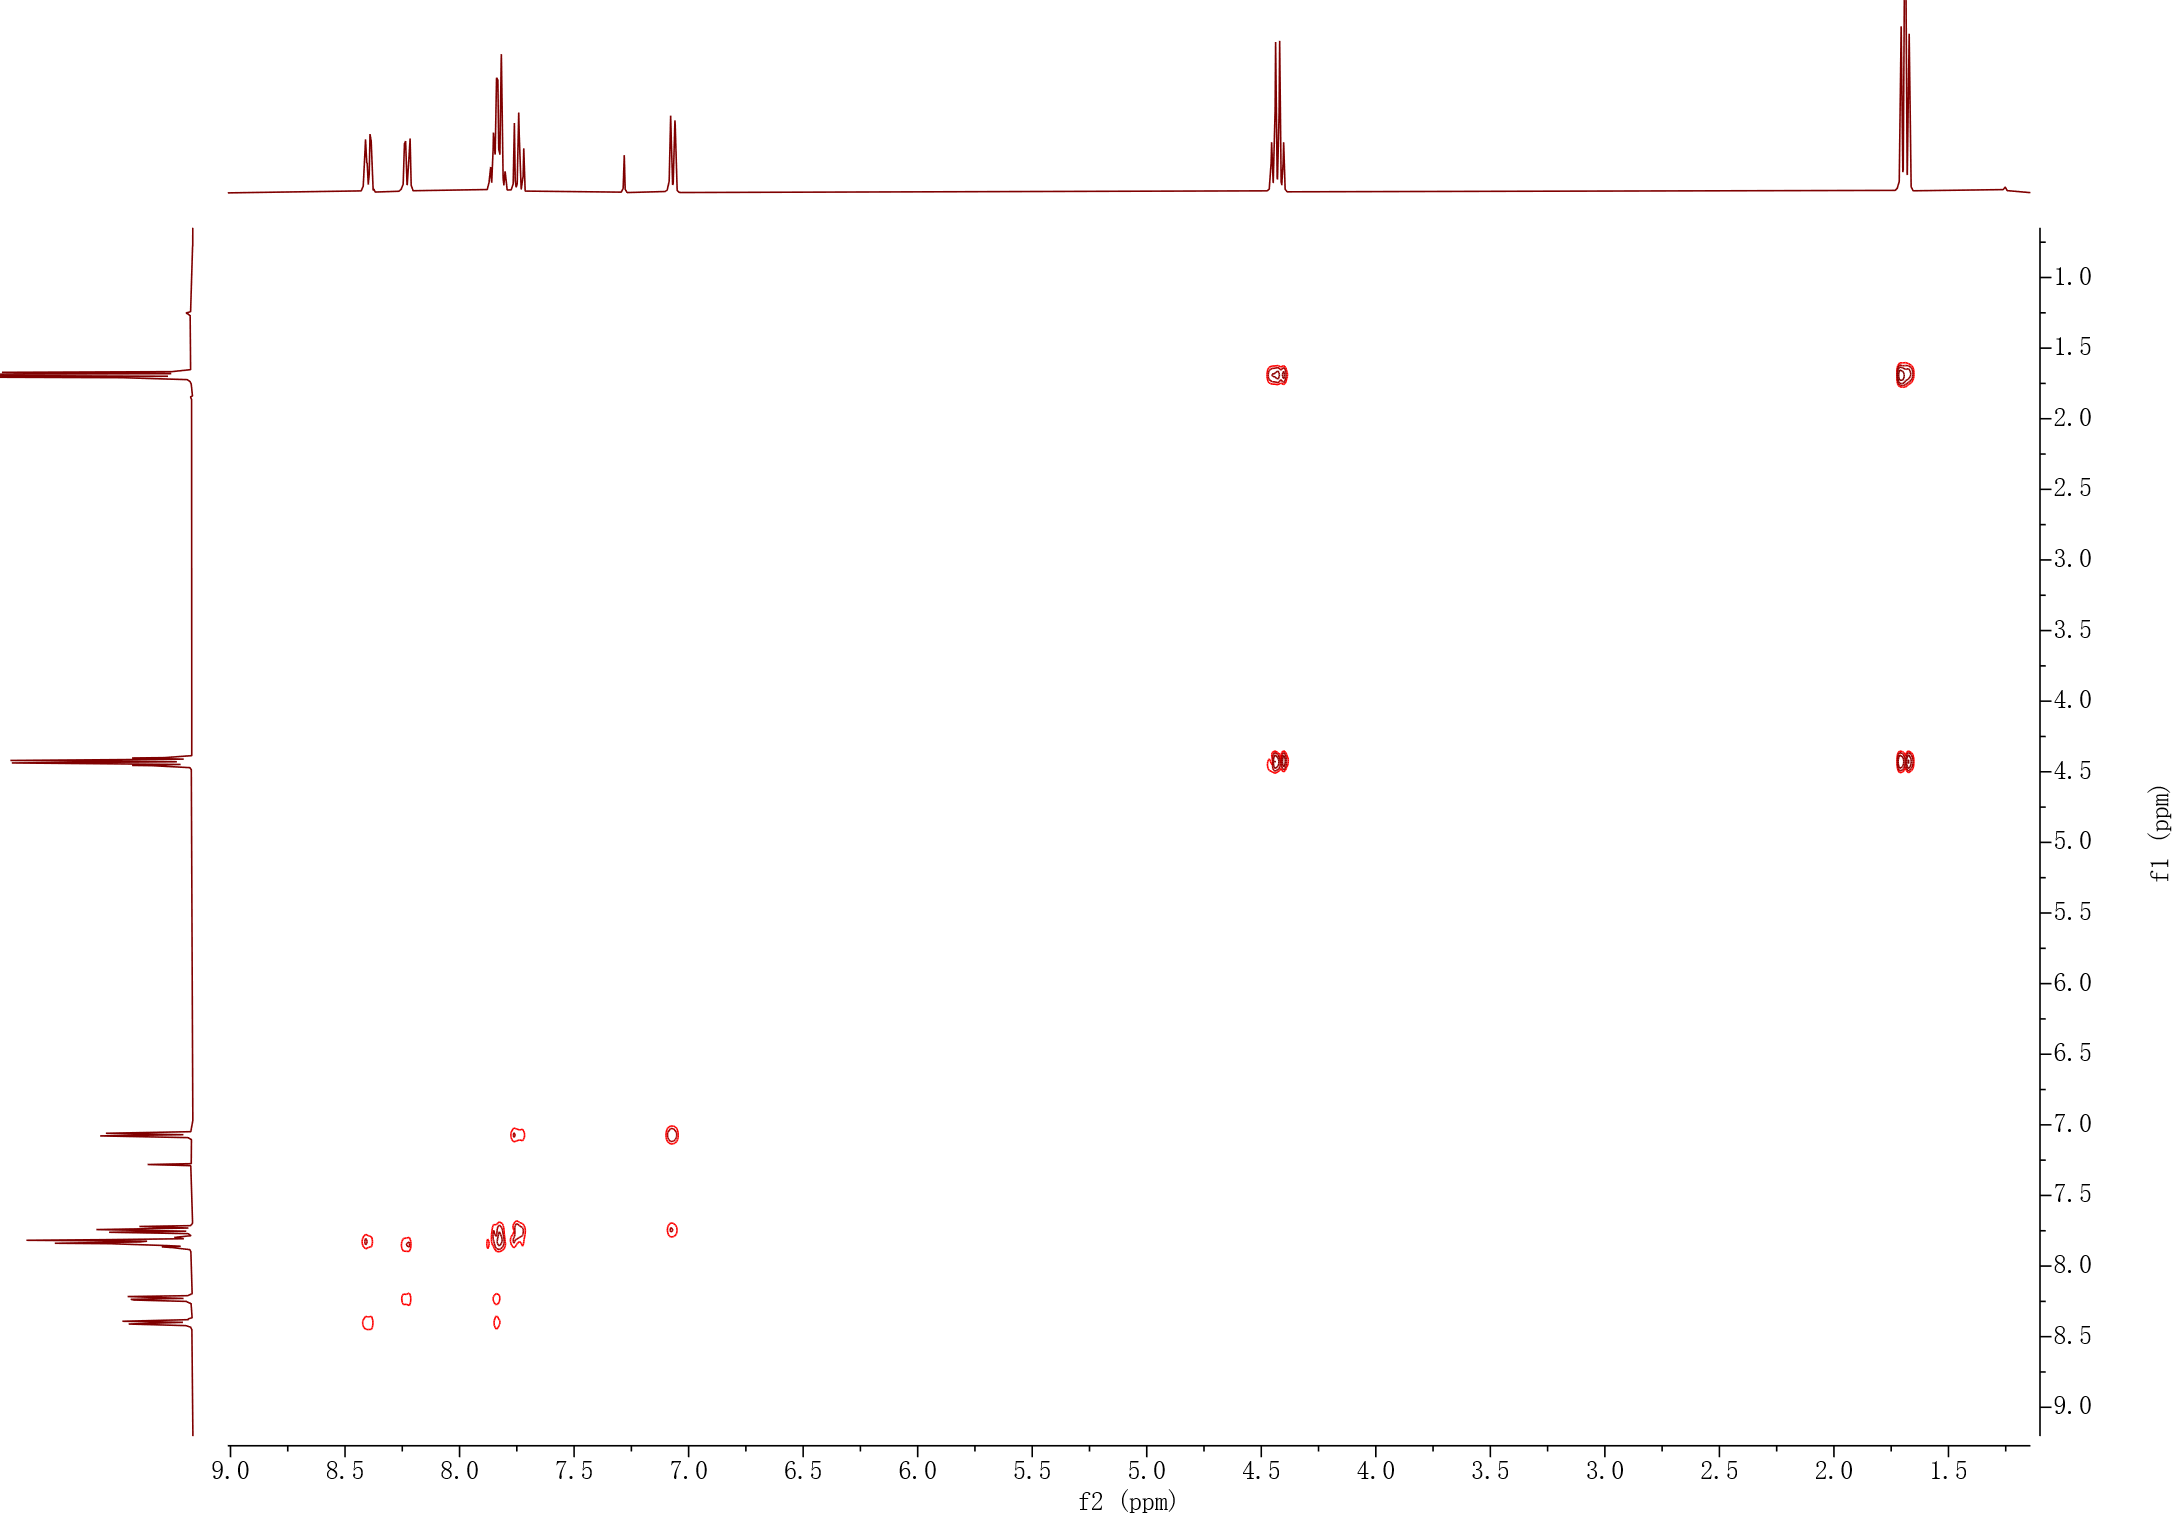
 **Figure S4.** 1H-1H COSY NMR of 1-ethoxyphenazine.


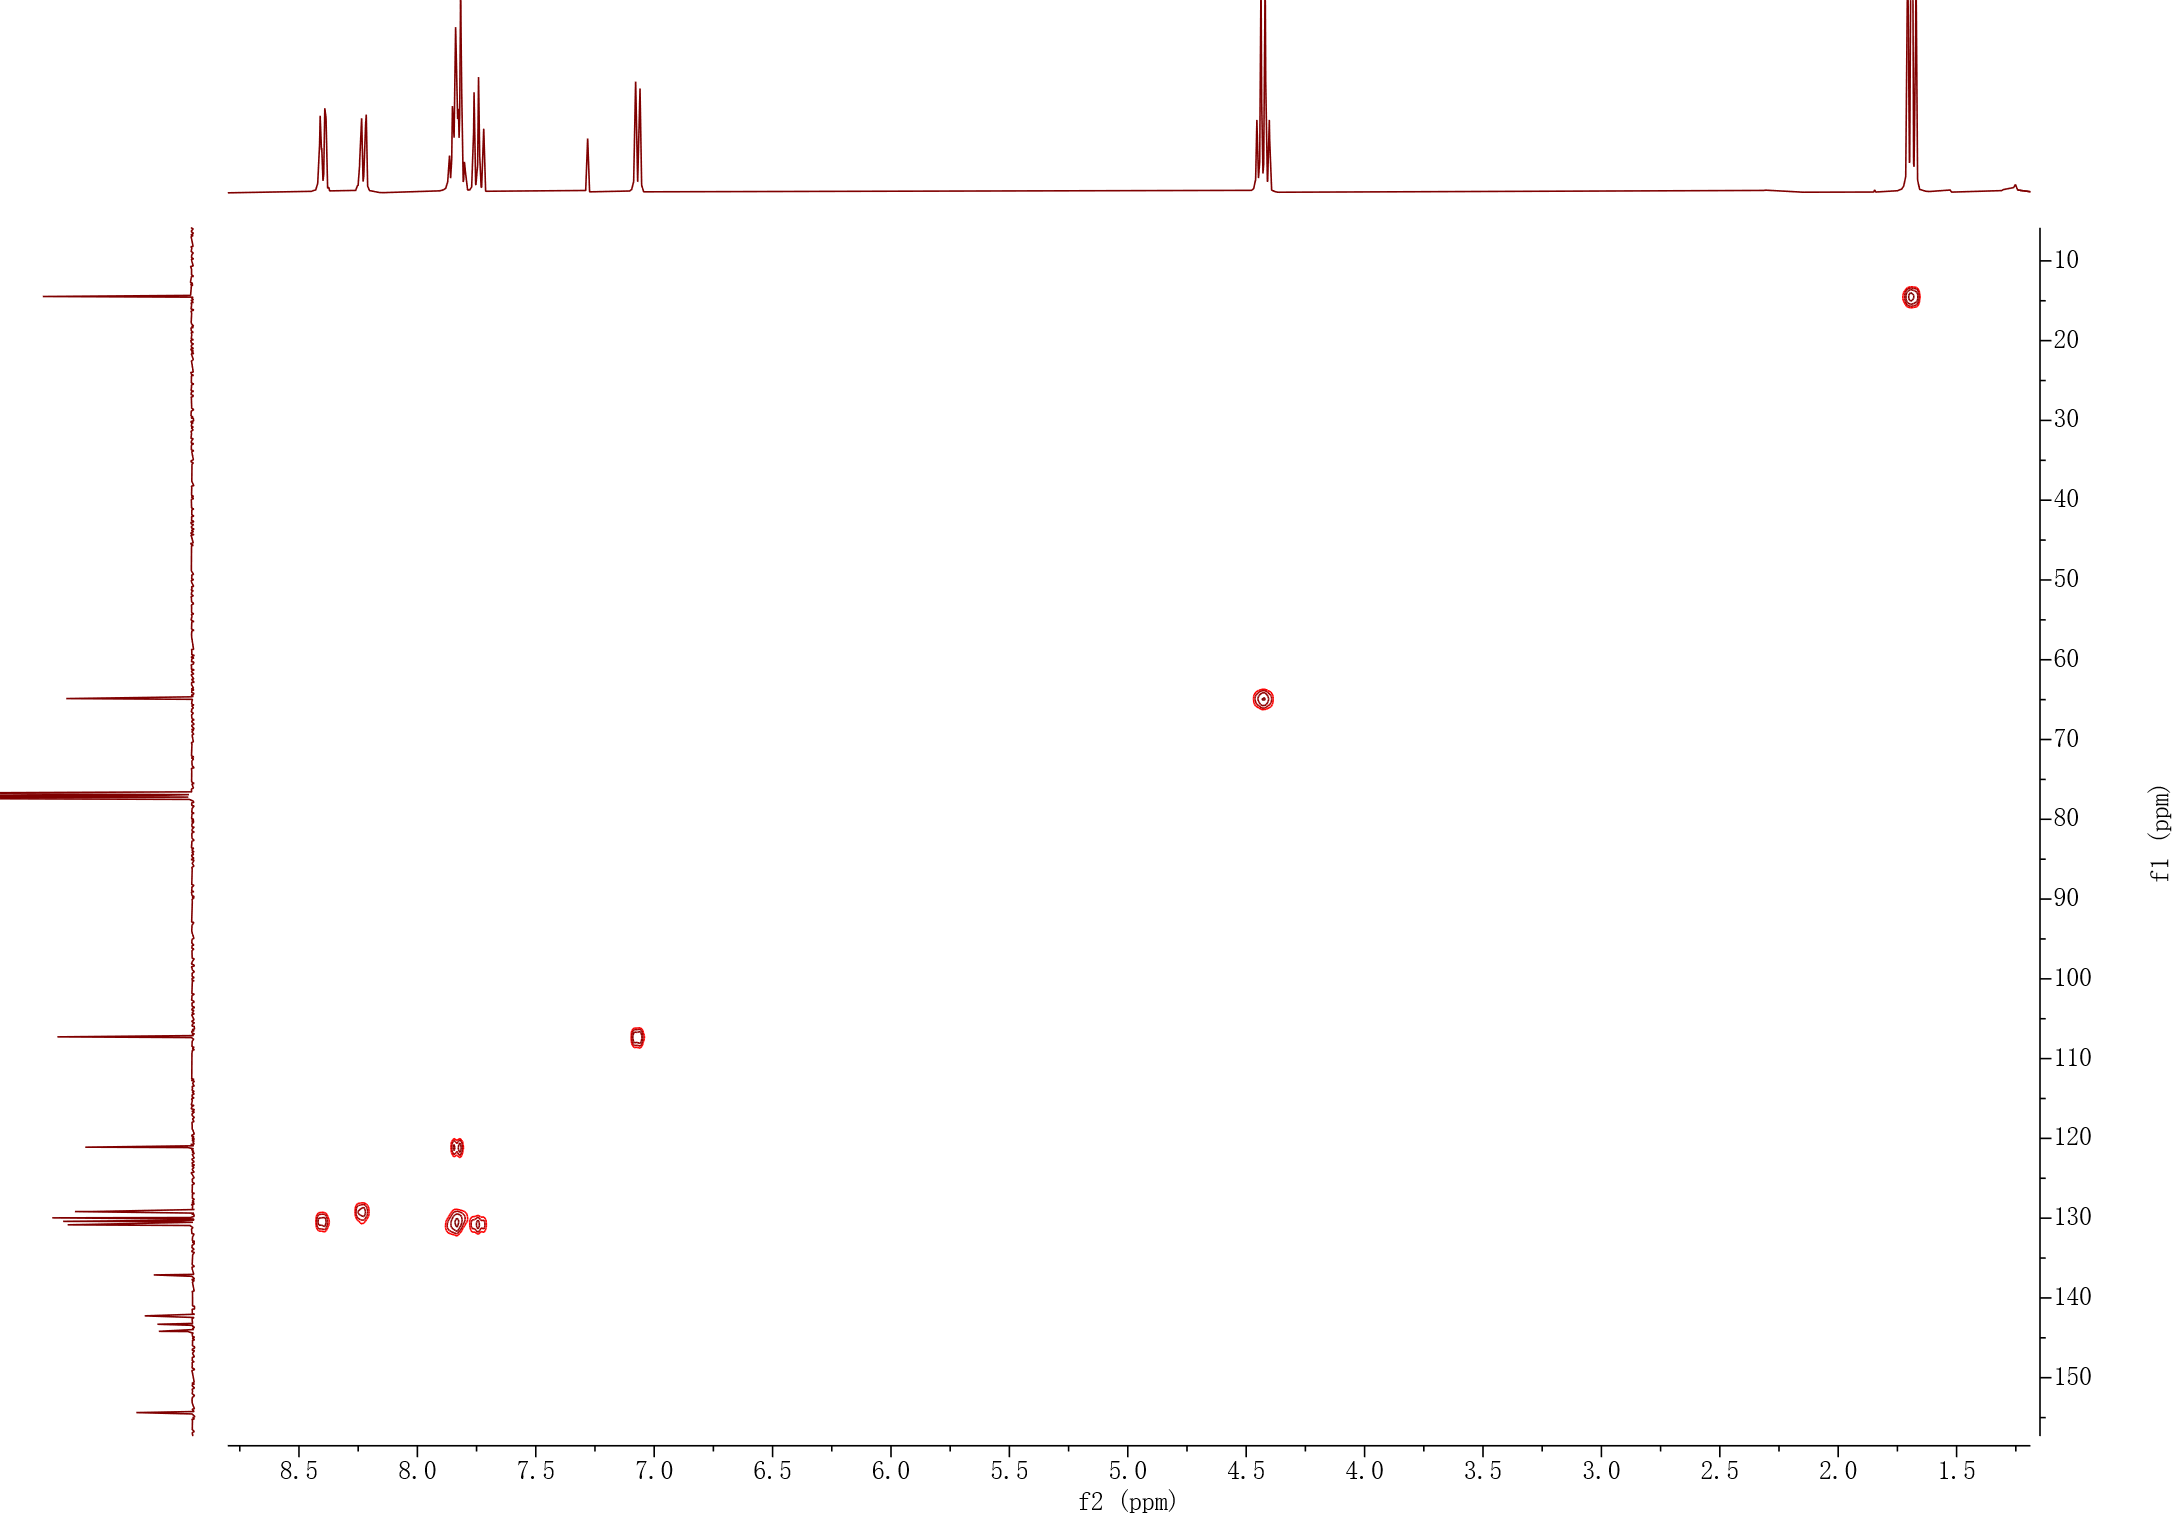
 **Figure S5.** HSQC NMR of 1-ethoxyphenazine.


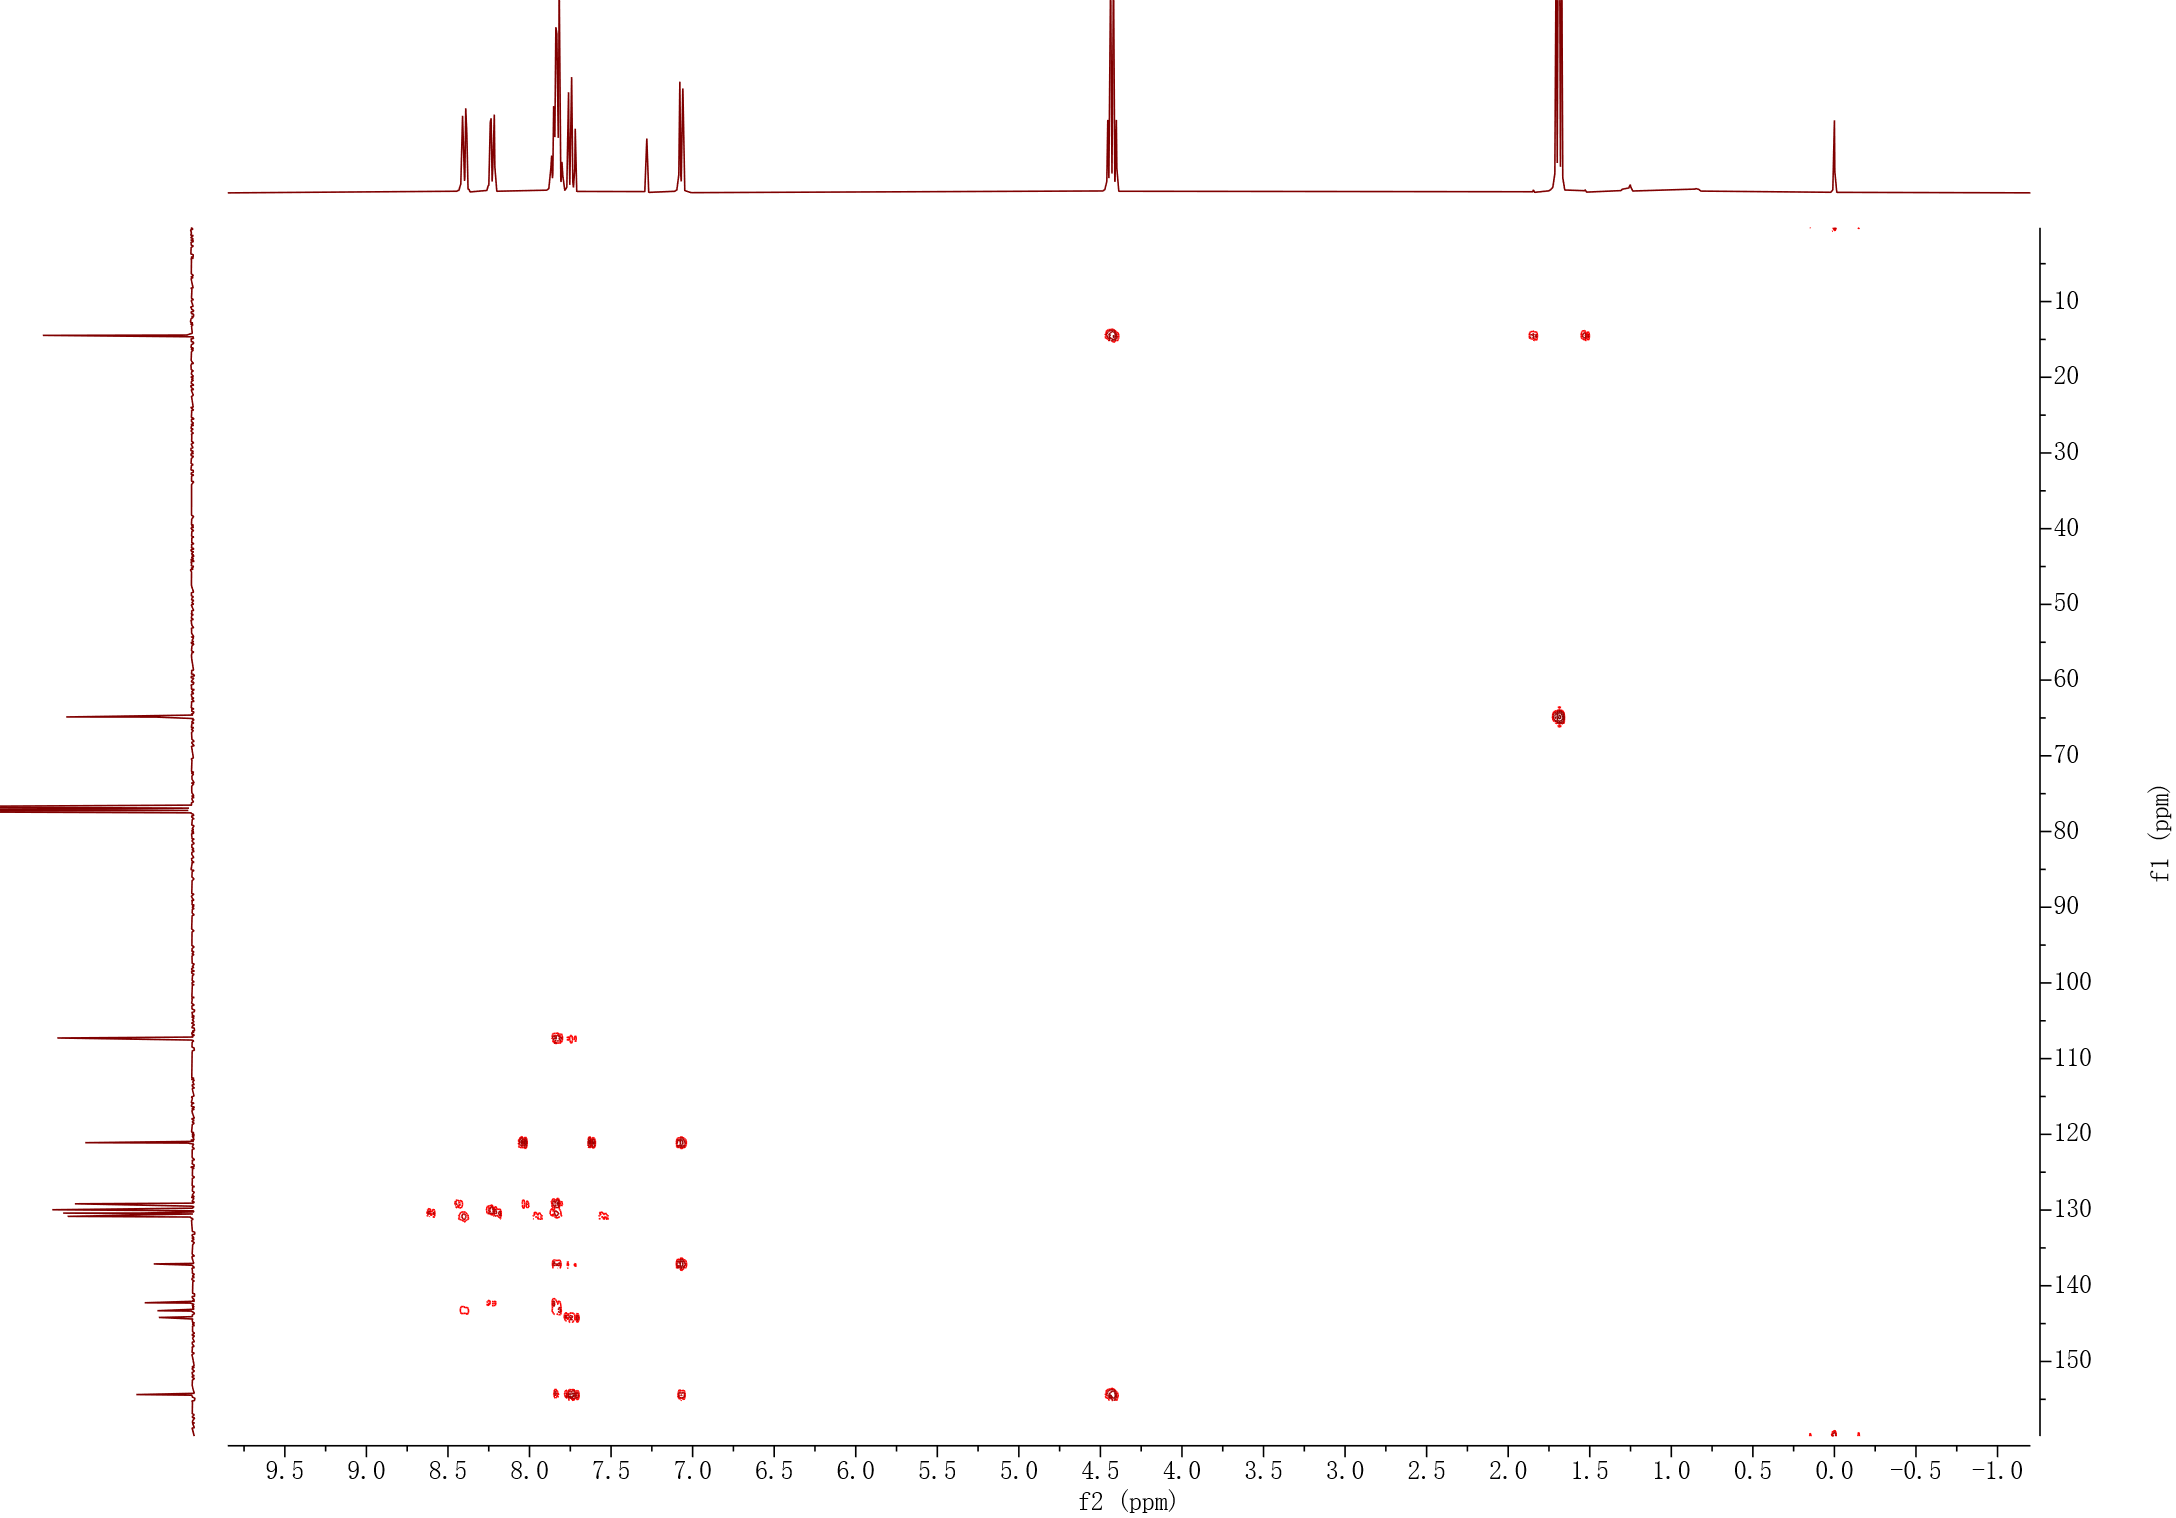
 **Figure S6.** HMBC NMR of 1-ethoxyphenazine.

**Table S4.** 1H and 13C spectra data for 1-ethoxyphenazine recorded by 400 MHz NMR spectrometer in CDCl3.

| Position | δC (ppm) | δH (ppm, J in Hz) | COSY | HMBC |
| --- | --- | --- | --- | --- |
| 1 | 154.4 |  |  | H-2, 3, 11 |
| 2 | 107.3 | 7.07 (dd, 7.5, 1.2) | H-3 | H-3, 4 |
| 3 | 130.7 | 7.74 (dd, 8.9, 7.5) | H-2, 4 |  |
| 4 | 121.1 | 7.77-7.89 (m) | H-3 | H-2 |
| 4a | 144.2 |  |  | H-3 |
| 5a | 142.2 |  |  | H-7, 9 |
| 6 | 129.2 | 8.23 (dd, 8.4, 1.8) | H-7 | H-7, 8 |
| 7 | 130.8 | 7.77-7.89 (m) | H-6, 8 | H-9 |
| 8 | 130.0 | 7.77-7.89 (m) | H-7, 9 | H-6 |
| 9 | 130.4 | 8.40 (dd, 8.4, 1.8) | H-8 | H-7 |
| 9a | 143.3 |  |  | H-8, 9 |
| 10a | 137.1 |  |  | H-2, 4 |
| 11 | 64.9 | 4.43 (q, 7.0) | H-12 | H-12 |
| 12 | 14.5 | 1.69 (t, 7.0) | H-11 | H-11 |

**Figure S7.***In vitro* production of 2-ethoxyphenazine from 2-hydroxyphenazine catalyzed by HMT1 and LaPhzM. (A) Schematic of the HMT1-LaPhzM cascade reaction using 2-hydroxyphenazine as the substrate; (B) HR-MS analysis of the resulting 2-ethoxyphenazine.

**Figure S8.** *In vitro* production of 2-propoxyphenazine from 2-hydroxyphenazine catalyzed by HMT1 and LaPhzM. (A) Schematic of the HMT1-LaPhzM cascade reaction using 2-hydroxyphenazine as the substrate; (B) HR-MS analysis of 2-propoxyphenazine.

**
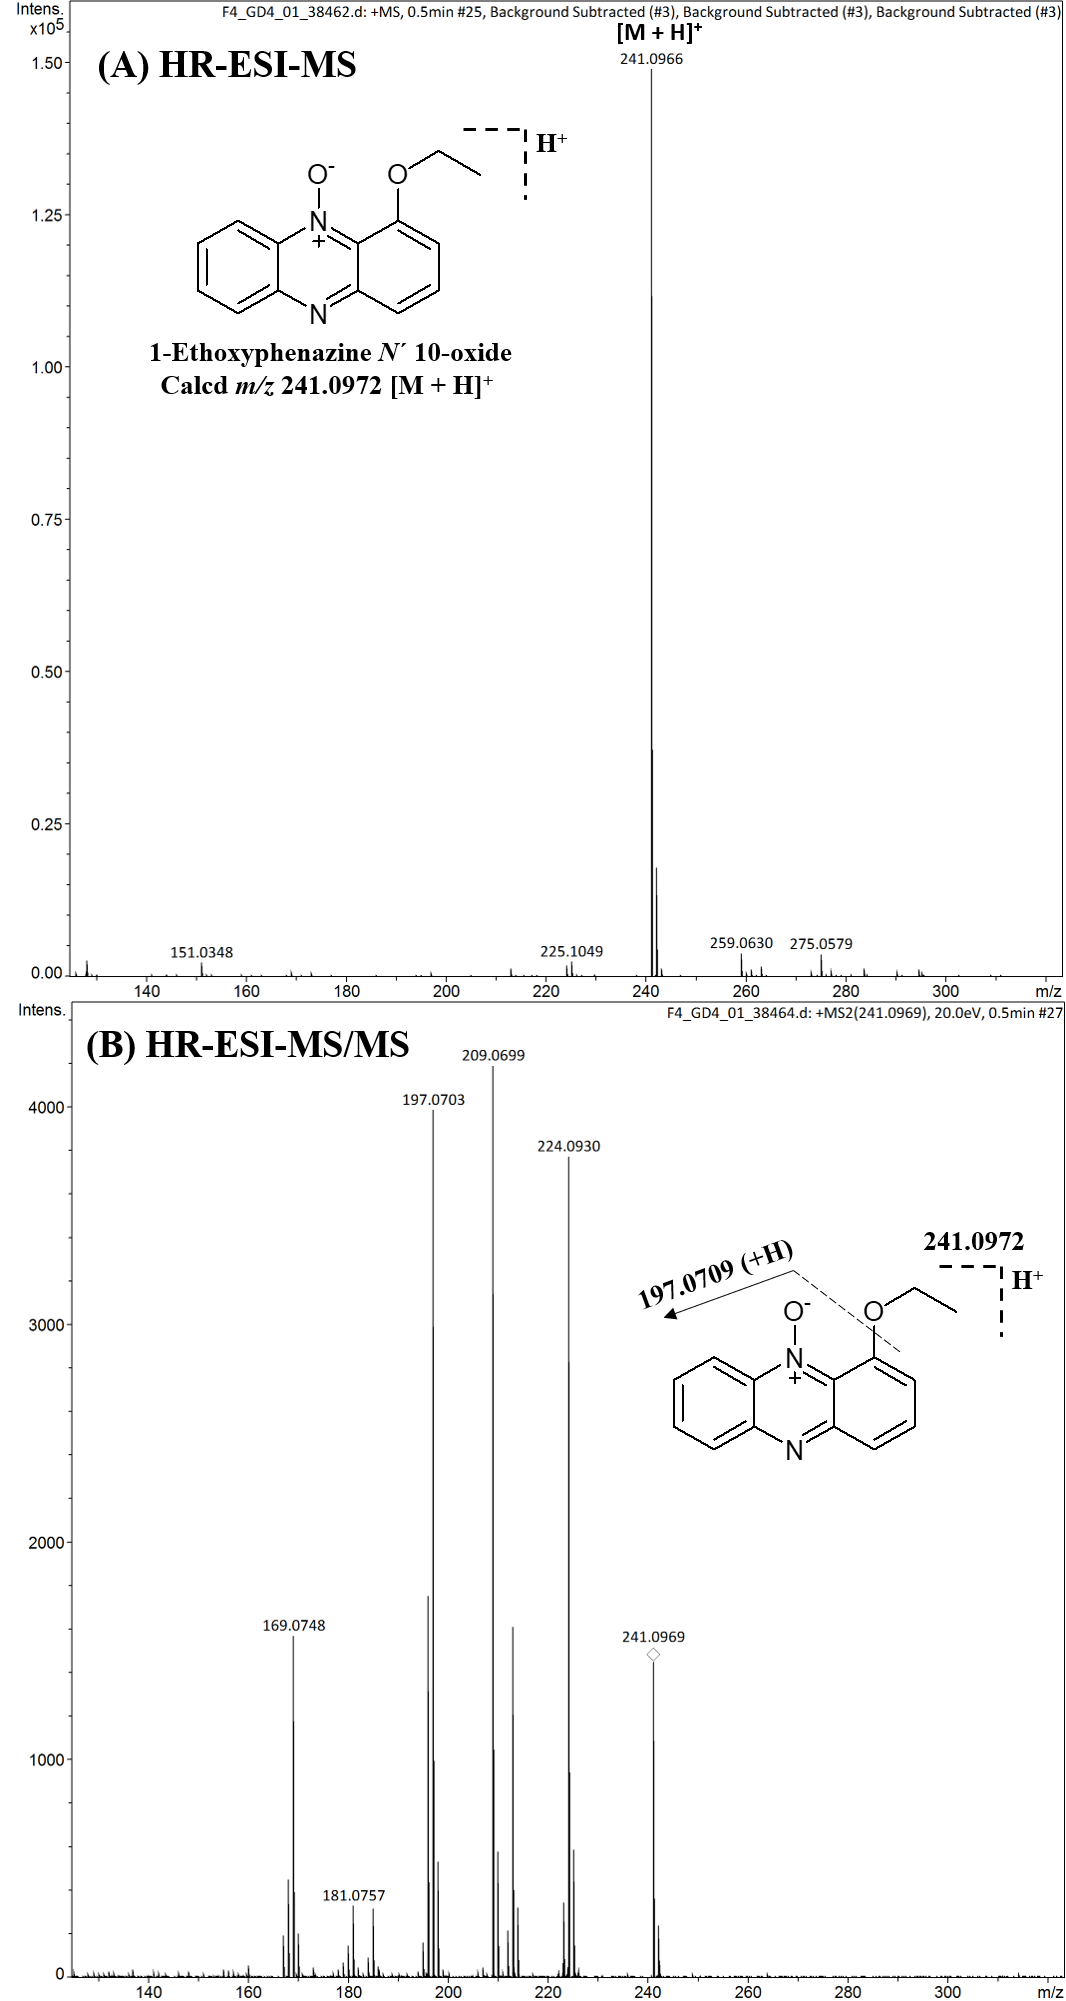
**

**Figure S9.** HR-MS analysis of 1-ethoxyphenazine *N*′ 10-oxide. (A) HR-ESI-MS analysis of 1-ethoxyphenazine *N*′ 10-oxide. (B) HR-ESI-MS/MS analysis of 1-ethoxyphenazine *N*′ 10-oxide.


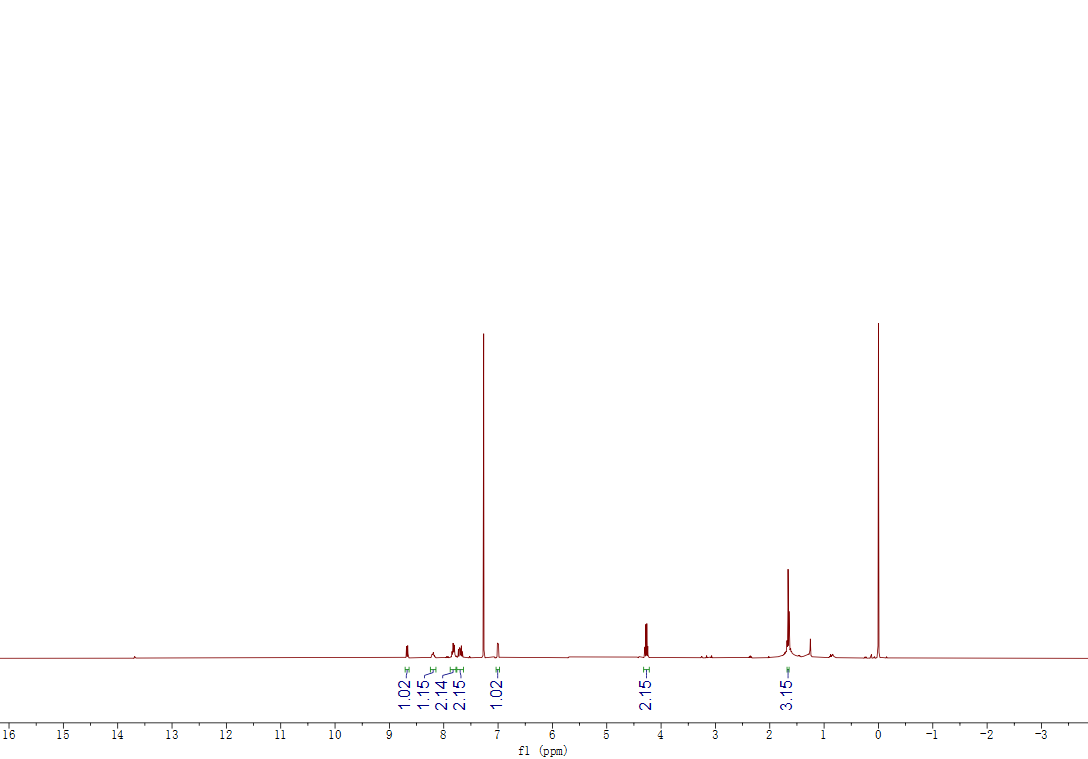


**Figure S10.** 1H NMR of 1-ethoxyphenazine *N*′ 10-oxide.


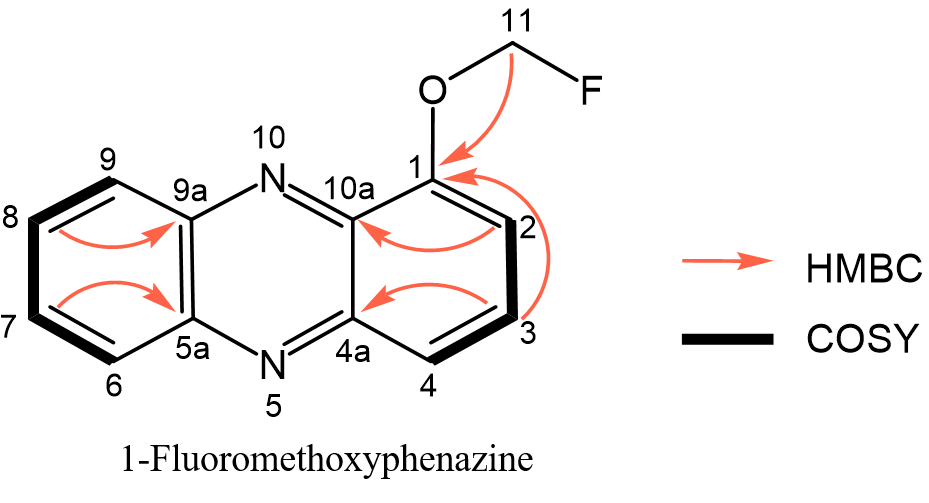


**Figure S11.** The structure of 1-fluoromethoxyphenazine with key ¹H-¹H COSY (bold lines) and HMBC (arrows) correlations.


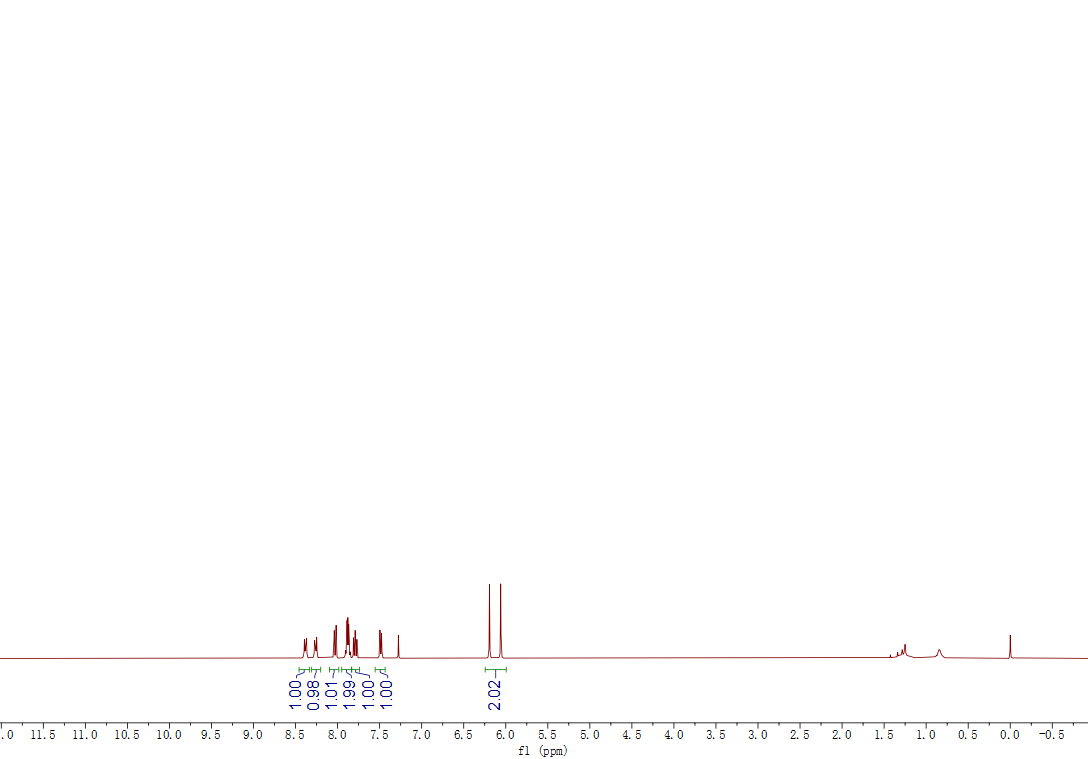


**Figure S12.** 1H NMR of 1-fluoromethoxyphenazine.

**
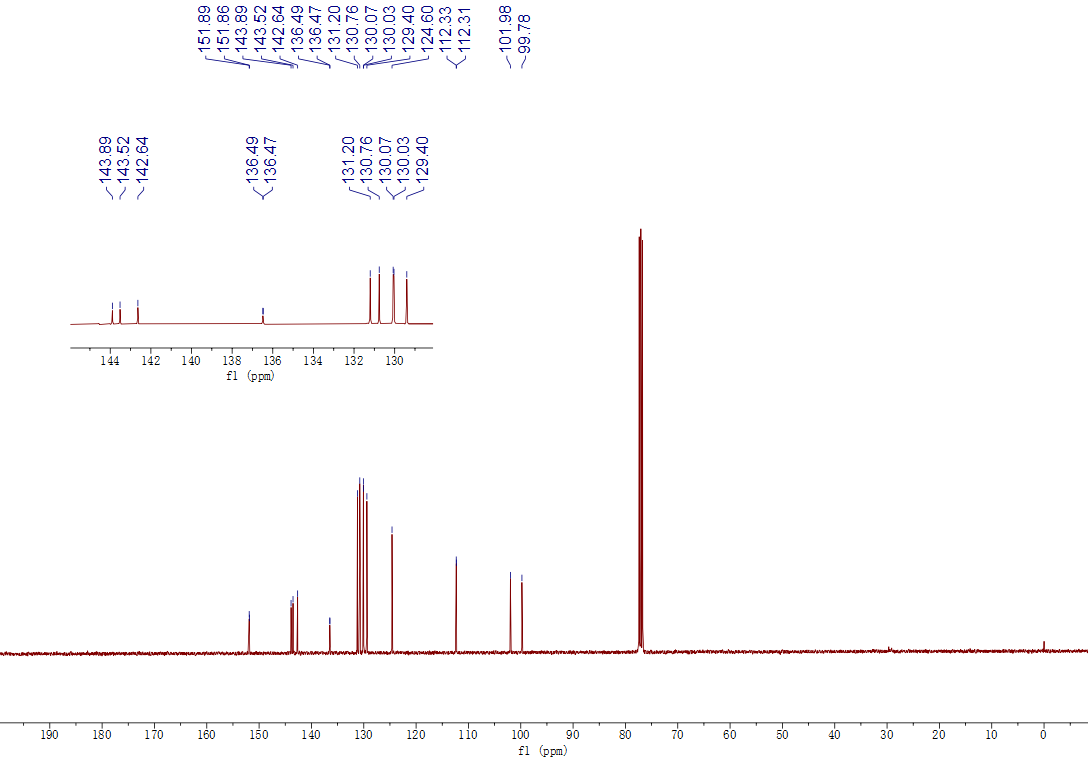
Figure** **S13.** 13C NMR of 1-fluoromethoxyphenazine.


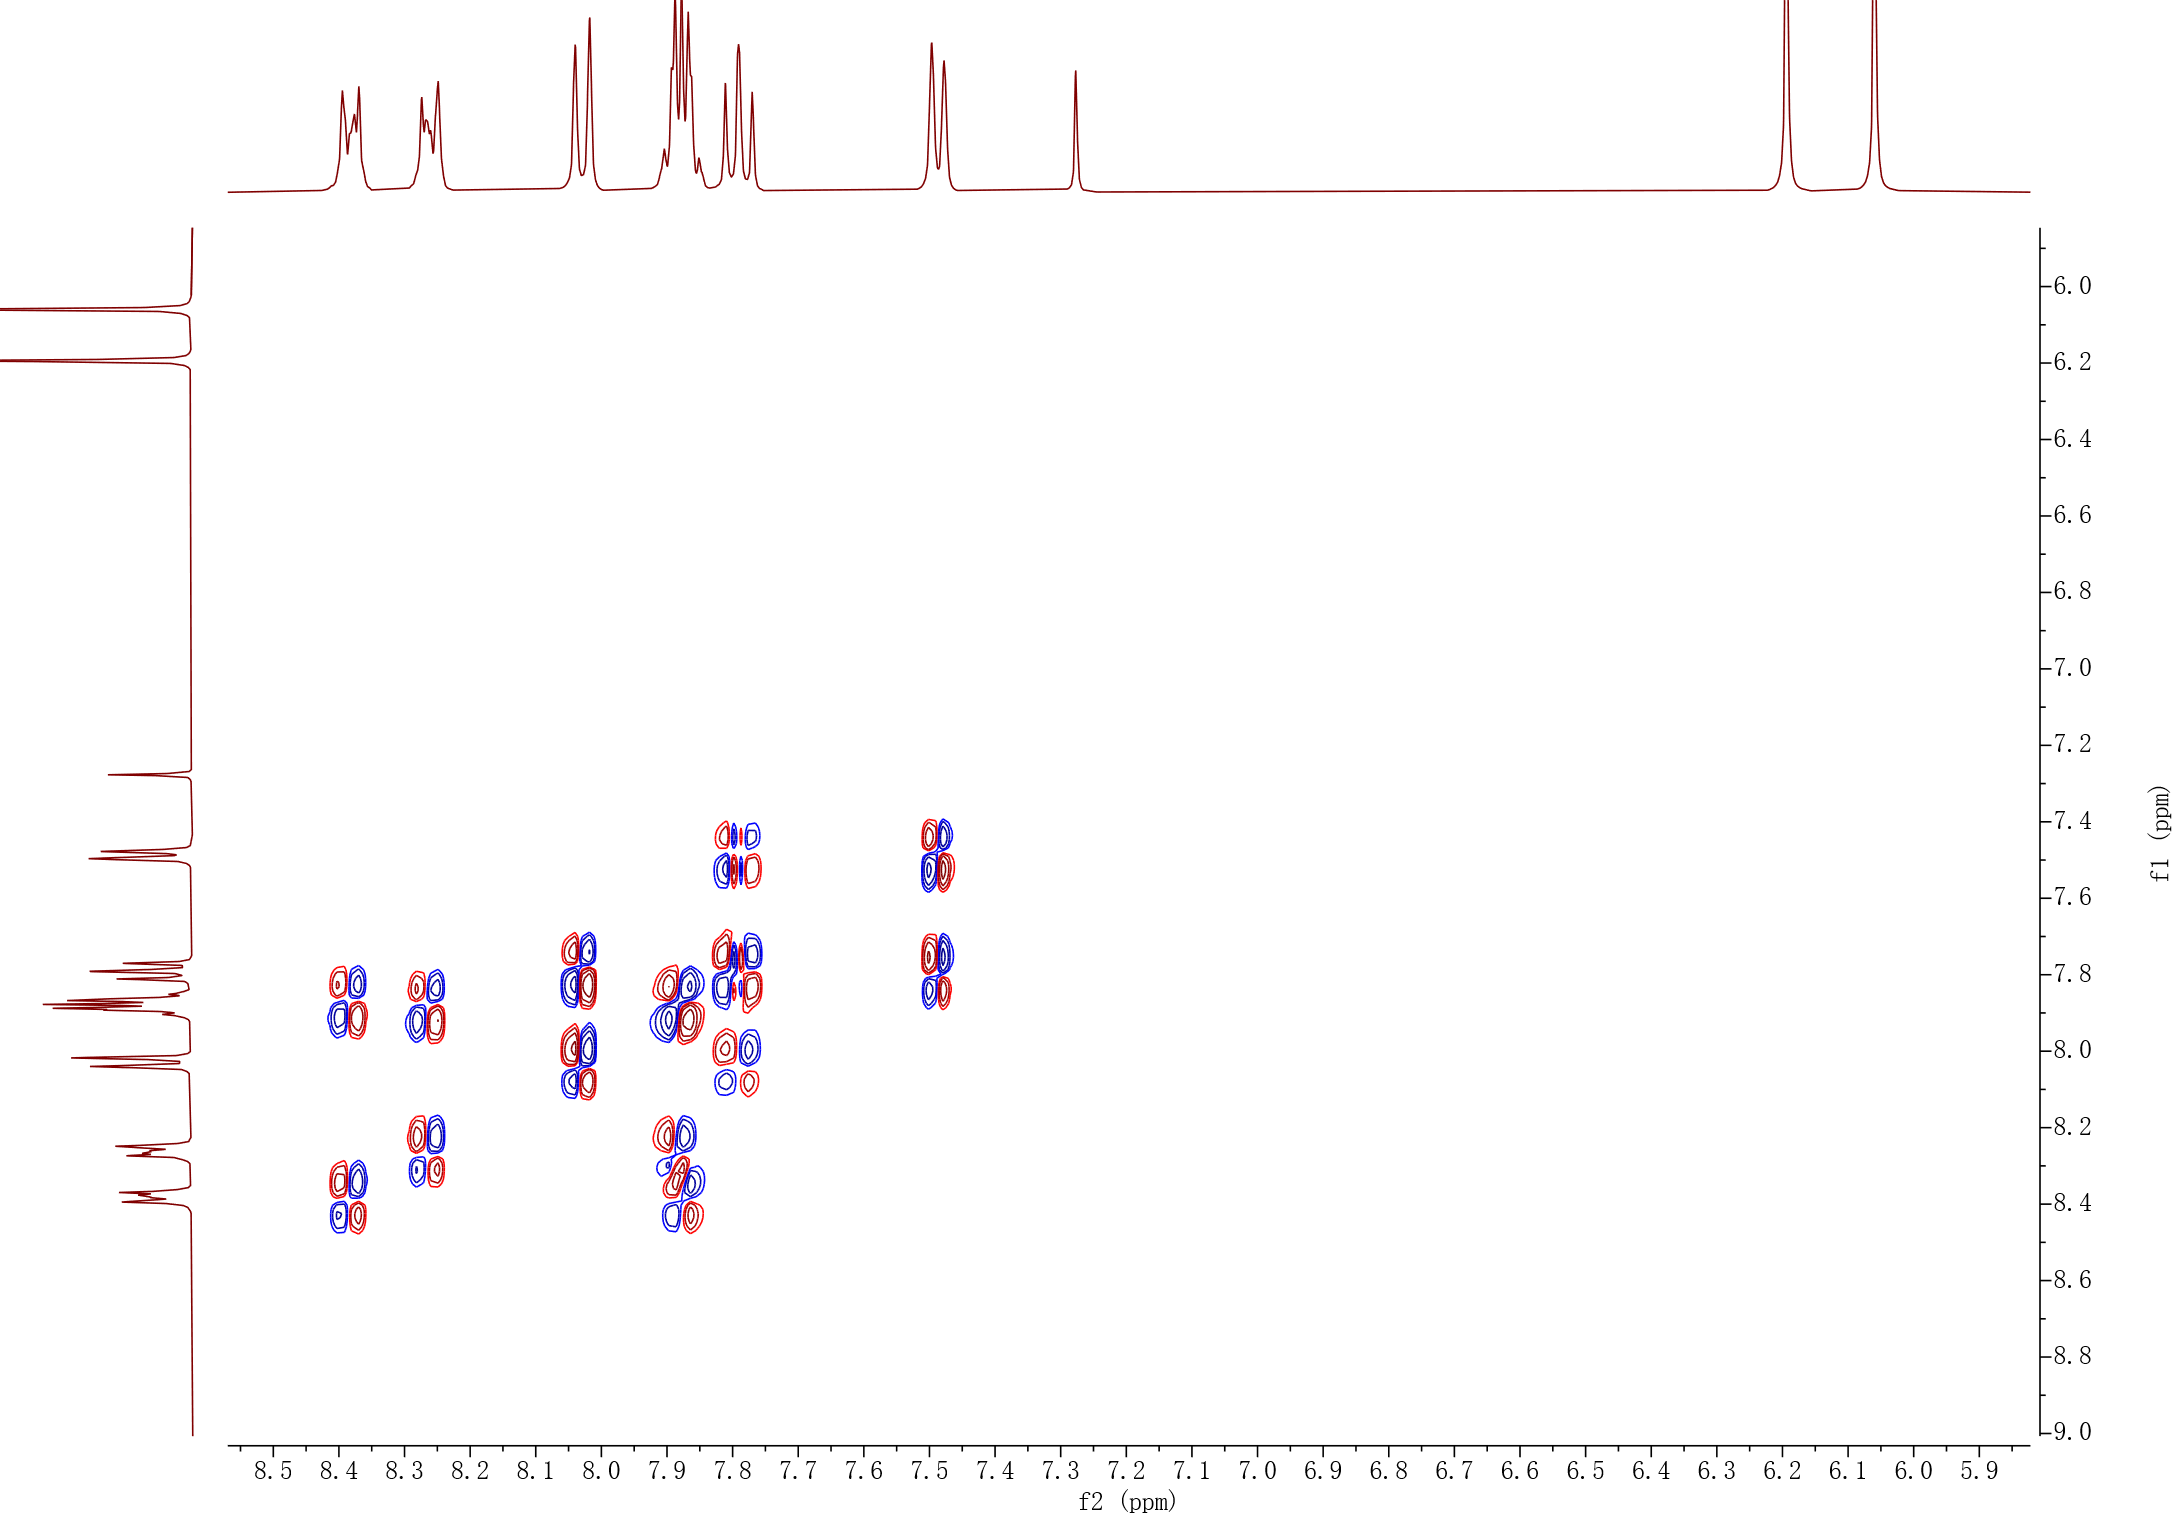


**Figure S14.** 1H-1H COSY NMR of 1-fluoromethoxyphenazine.


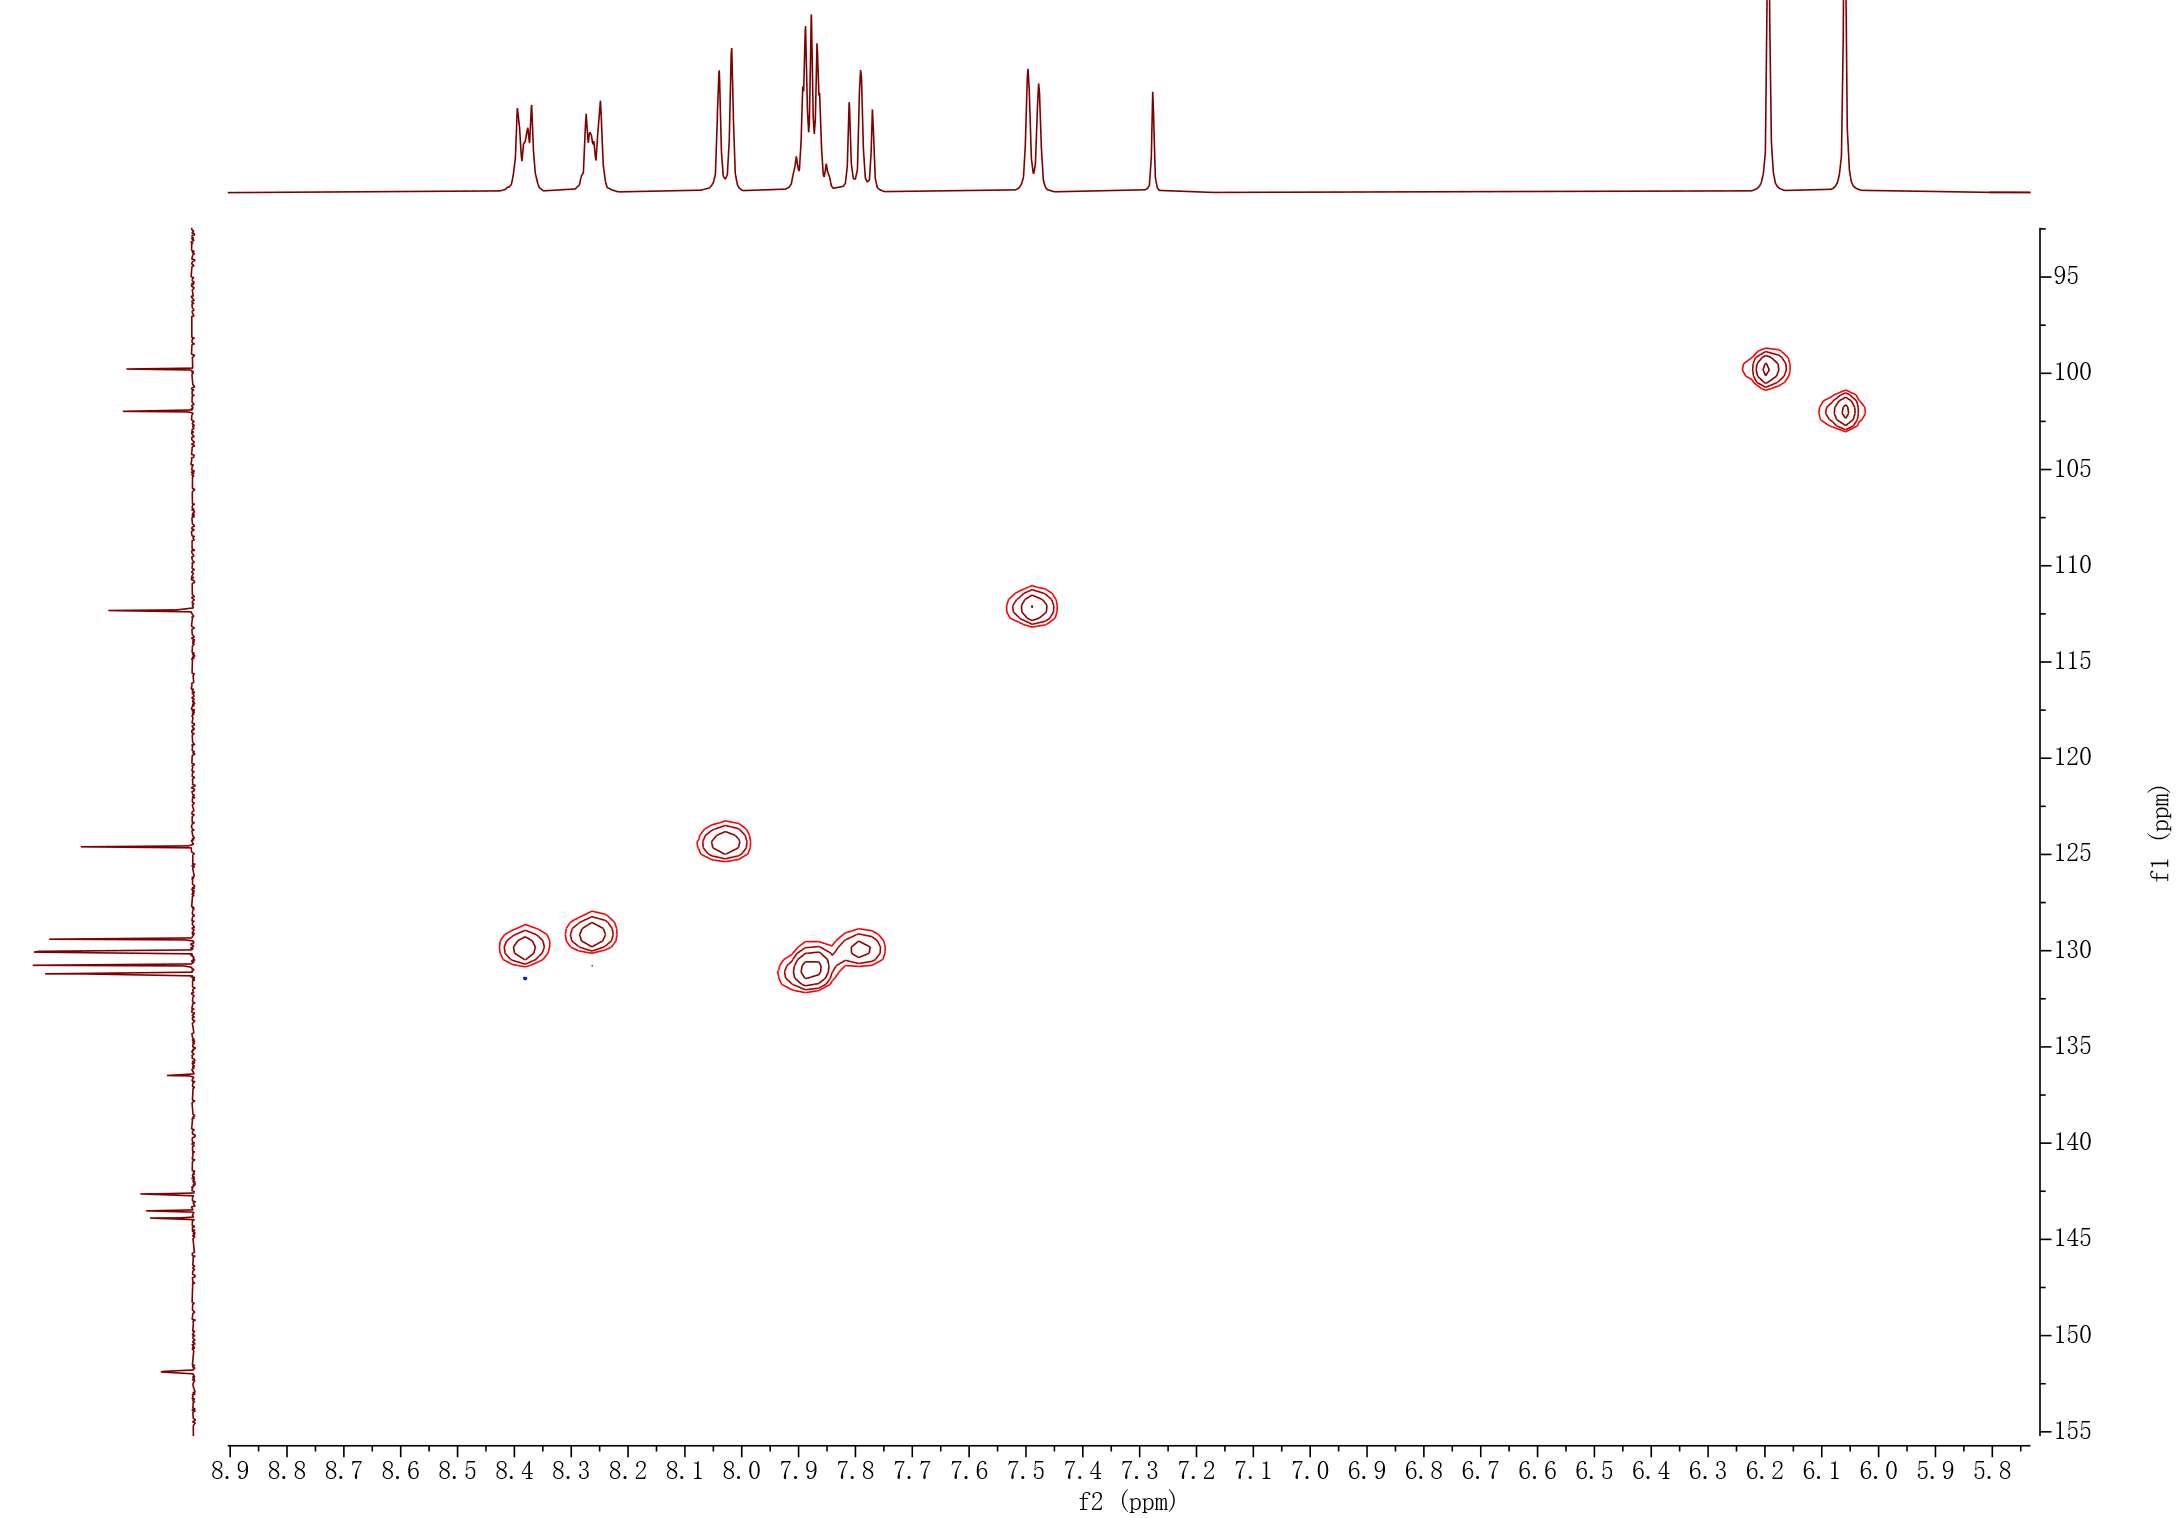
 **Figure S15.** HSQC NMR of 1-fluoromethoxyphenazine.


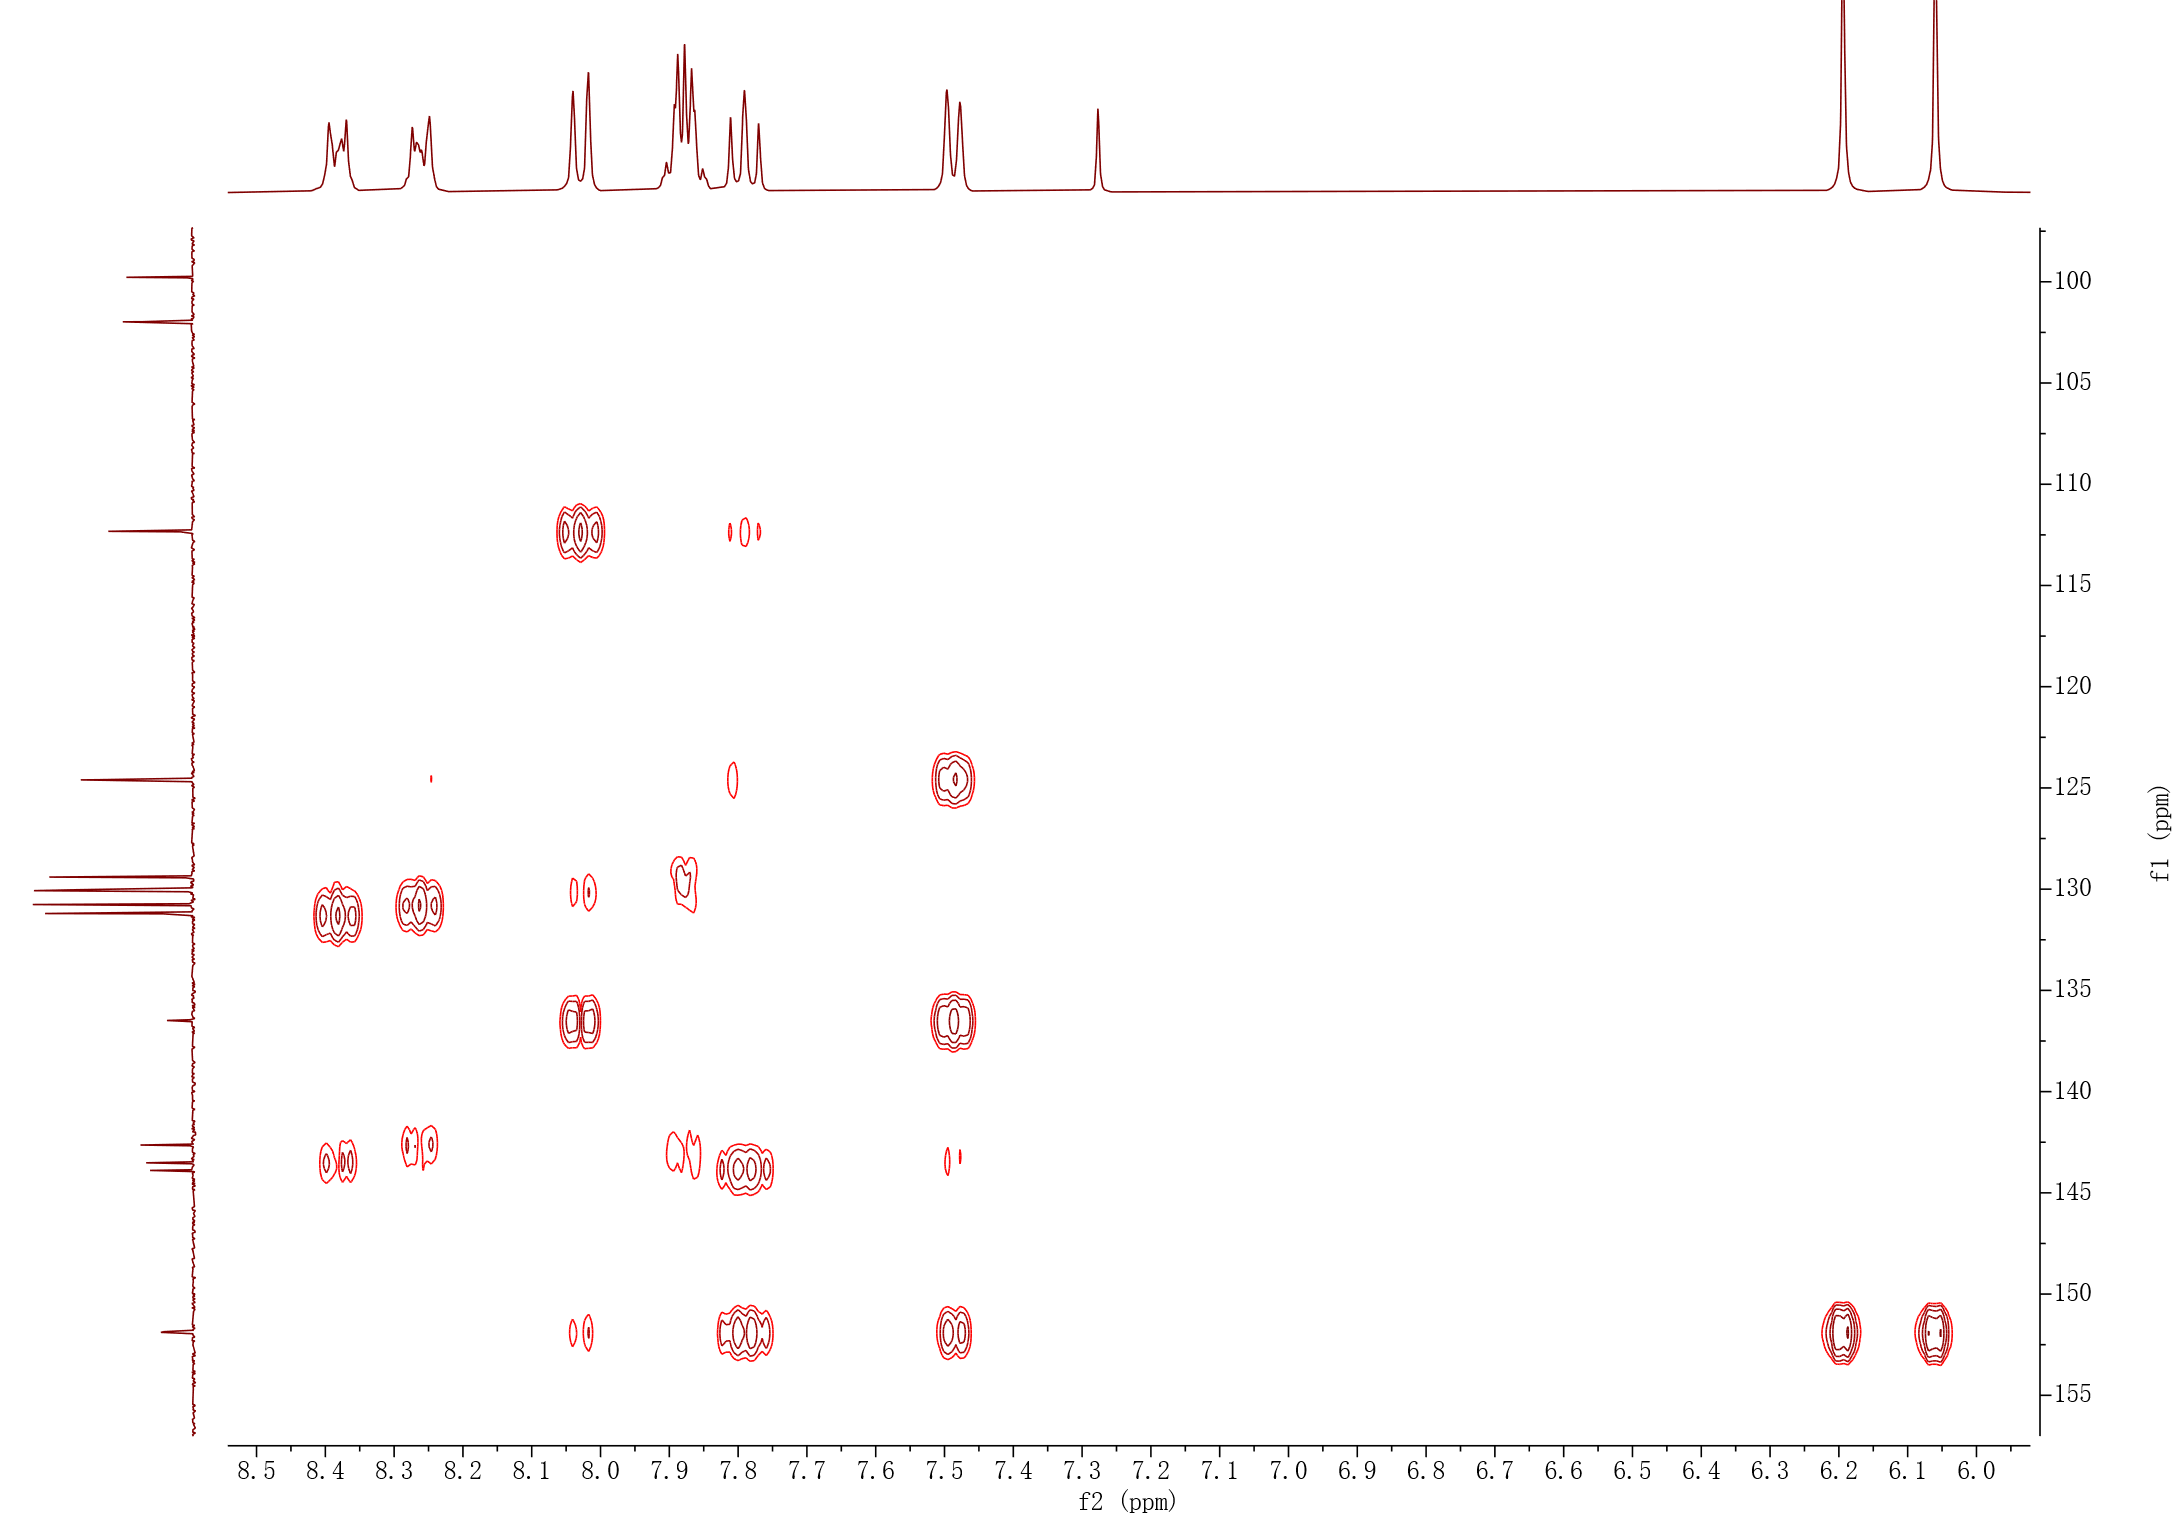
 **Figure** **S16.** HMBC NMR of 1-fluoromethoxyphenazine.

**Table S5.** 1H and 13C spectra data for 1-fluoromethoxyphenazine recorded by 400 MHz NMR spectrometer in CDCl3.

| Position | δC (ppm, J in Hz) | δH (ppm, J in Hz) | COSY | HMBC |
| --- | --- | --- | --- | --- |
| 1 | 151.9(d, 3.2) |  |  | H-2, 3, 11 |
| 2 | 112.3(d, 2.2) | 7.49(d, 7.5) | H-3 | H-3, 4 |
| 3 | 130.1 | 7.79(dd, 8.8, 7.6) | H-2, 4 | H-4 |
| 4 | 124.6 | 8.03(d, 8.8) | H-3 | H-2, 3 |
| 4a | 143.9 |  |  | H-3 |
| 5a | 143.5 |  |  | H-7, 9 |
| 6 | 130.1 | 8.22-8.31(m) | H-7 | H-8 |
| 7 | 131.2 | 7.84-7.93(m) | H-6, 8 | H-9 |
| 8 | 130.8 | 7.84-7.93(m) | H-7, 9 | H-6 |
| 9 | 129.4 | 8.34-8.44(m) | H-8 | H-7 |
| 9a | 142.6 |  |  | H-6, 8 |
| 10a | 136.5(d, 1.5) |  |  | H-2, 4 |
| 11 | 100.9(d, 221.4) | 6.13(d, 53.7) |  |  |

**Table S6.** Alkylation reactions of phenazine analogues.

| **Entry** | **Substrates** | **Enzymes** | **Products** | **Yield (%)** |
| --- | --- | --- | --- | --- |
| 1 | 1-hydroxyphenazine (**1**) and EtI | LaphzM and HMT1 | 1-ethoxyphenazine(**1a)** | 96 |
| 2 | 2-hydroxyphenazine (**2**) and EtI | LaphzM and HMT1 | 2-ethoxyphenazine (**2a1**) | 21 |
| 3 | 2-hydroxyphenazine(**2**) and PrI | LaphzM and HMT1 | 2-propoxyphenazine (**2a2**) | 12 |
| 4 | 1-hydroxyphenazine (**1**) and EtI | NaphzNO1, LaphzM and HMT1 | 1-ethoxyphenazine-*N*′10-oxide (**1b**) | 72 |
| 5 | 1-hydroxyphenazine (**1**) and FMeI | LaphzM and HMT2 | 1-fluoromethoxyphenazine  (**1c**) | 98 |
| 6 | 2-hydroxyphenazine (**2**) and FMeI | LaphzM and HMT2 | 2-fluoromethoxyphenazine (**2b**) | 46 |


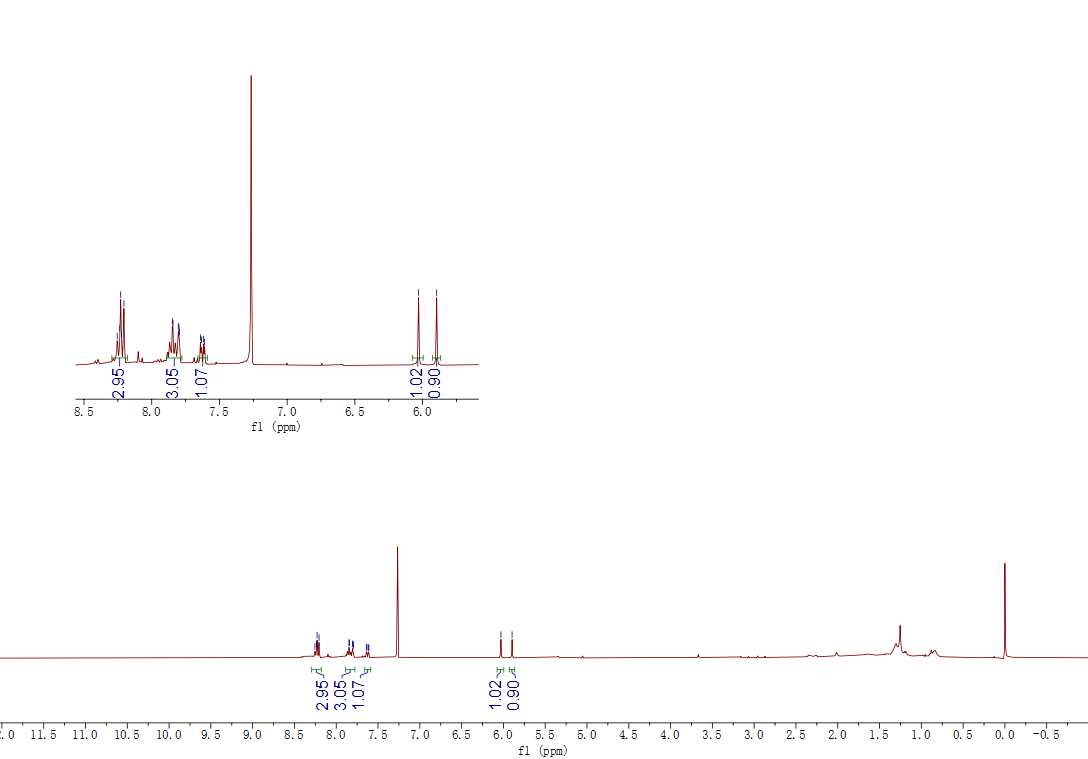


**Figure S17.** 1H NMR of 2-fluoromethoxyphenazine.


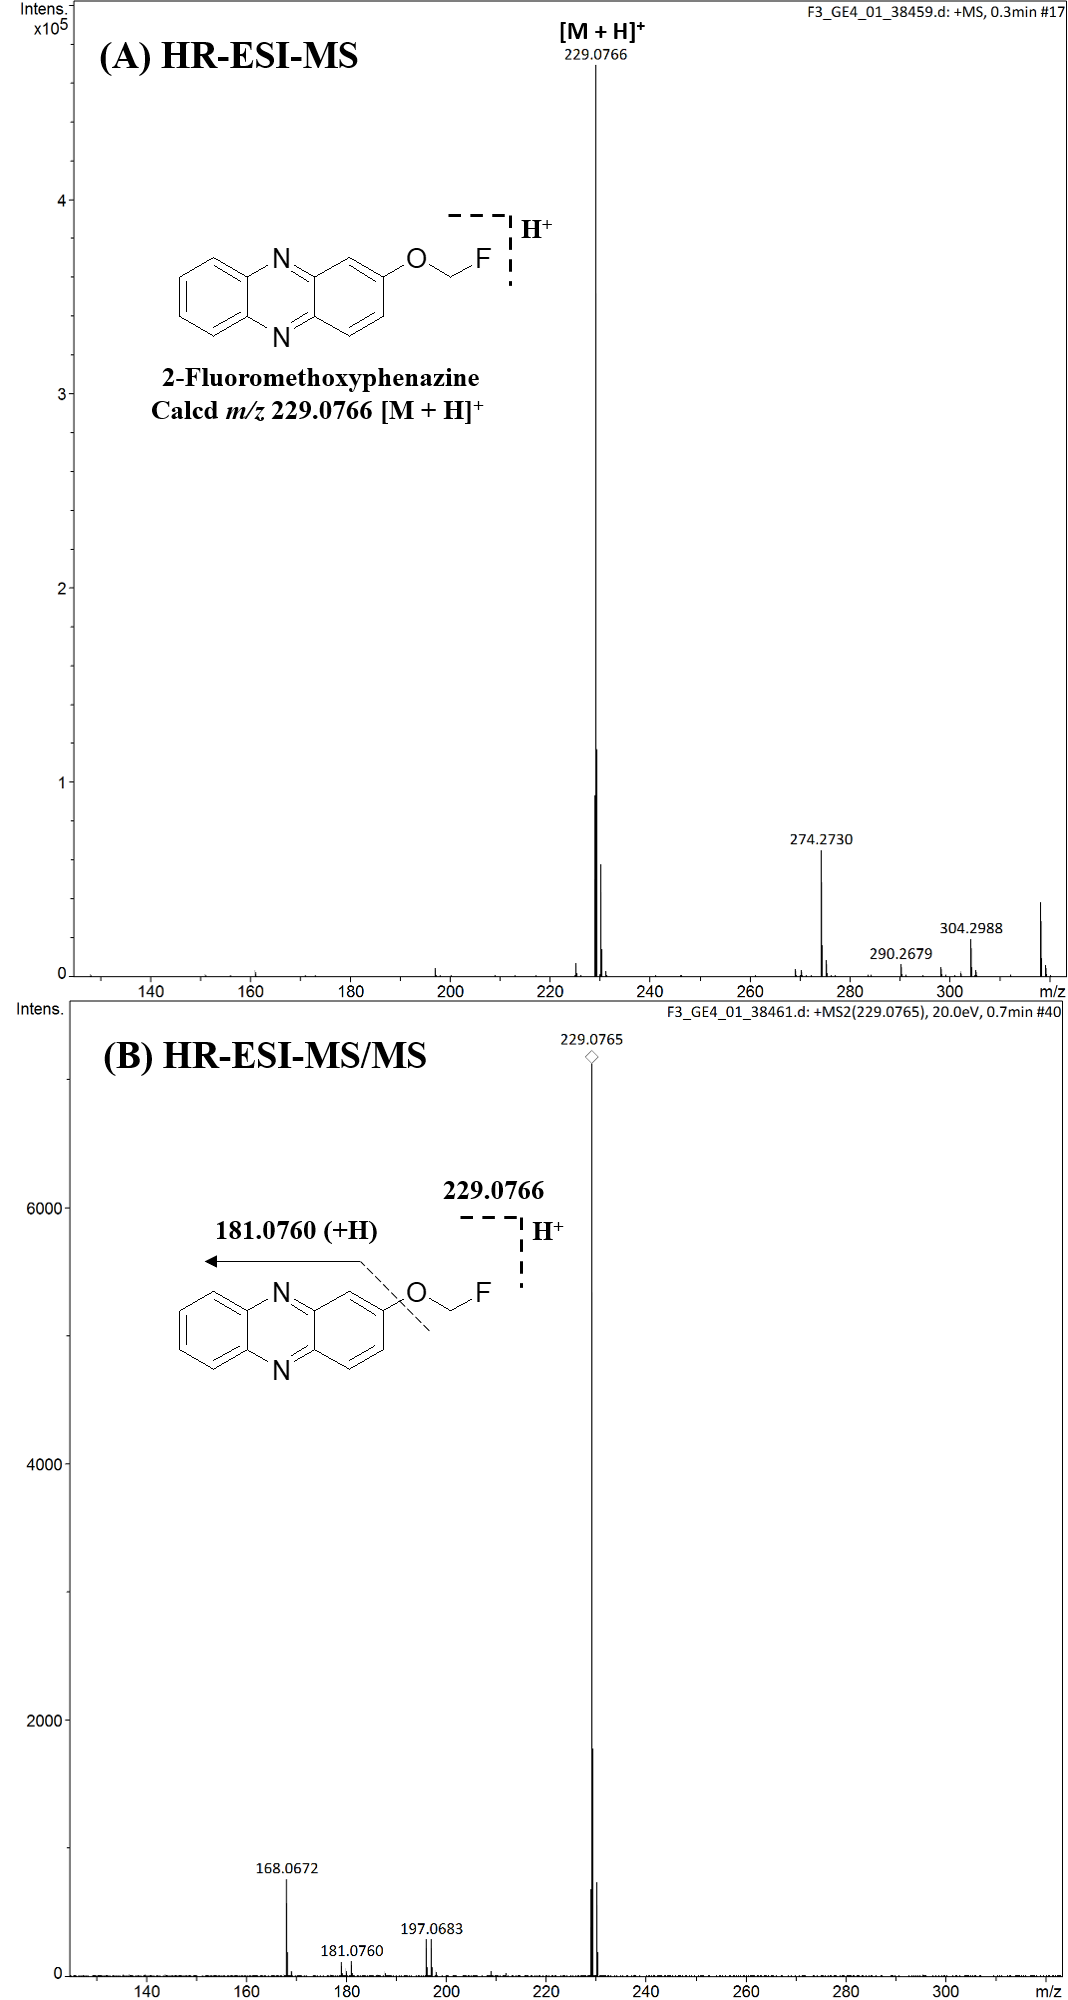


**Figure S18.** HR-MS analysis of 2-fluoromethoxyphenazine. (A) HR-ESI-MS analysis of 2-fluoromethoxyphenazine. (B) HR-ESI-MS/MS analysis of 2-fluoromethoxyphenazine.

# References

[1] Liu H, Zhu G, Zhao S, Fu P, Zhu W. Bioactive Natural Products from the Marine Sponge-Derived *Nocardiopsis dassonvillei* OUCMDZ-4534. Chinese J Org Chem., 2019, 39(2): 507.

[2] Hou F, Xian M, and Huang W. *De novo* biosynthesis and whole-cell catalytic production of paracetamol on a gram scale in *Escherichia coli*. Green Chemistry, 2021, 23(20): 8280-8289.
